# Supplementary material for: Dietary changes and associations with metabolic improvements in adults with type 2 diabetes during a patient-centred dietary intervention: an exploratory analysis
Source: PubMed Central journal article supplement — BMJ Open. 2014 Jun 13;4(6):e004953. doi: 10.1136/bmjopen-2014-004953 (PMC4067834; doi:10.1136/bmjopen-2014-004953), 2014-06-13
Supplement: bmjopen-2014-004953.draft_revisions.pdf [file bmjopen-2014-004953.draft_revisions.pdf]

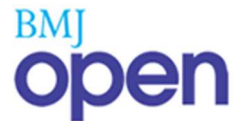

**Dietary changes and associations with metabolic improvements in adults with Type 2 diabetes during a patient-centred dietary intervention: a secondary analysis**

|                                 |                                                                                                                                                                                                                                                                                                                                                                                                                                                               |
|---------------------------------|---------------------------------------------------------------------------------------------------------------------------------------------------------------------------------------------------------------------------------------------------------------------------------------------------------------------------------------------------------------------------------------------------------------------------------------------------------------|
| Journal:                        | <i>BMJ Open</i>                                                                                                                                                                                                                                                                                                                                                                                                                                               |
| Manuscript ID:                  | bmjopen-2014-004953                                                                                                                                                                                                                                                                                                                                                                                                                                           |
| Article Type:                   | Research                                                                                                                                                                                                                                                                                                                                                                                                                                                      |
| Date Submitted by the Author:   | 28-Jan-2014                                                                                                                                                                                                                                                                                                                                                                                                                                                   |
| Complete List of Authors:       | England, Clare; University of Bristol, Centre for Exercise, Nutrition and Health Sciences<br>Thompson, Janice; The University of Birmingham, School of Sport & Exercise Sciences<br>Jago, Russ; University of Bristol, Centre for Exercise, Nutrition and Health Sciences<br>Cooper, Ashley; University of Bristol, Centre for Exercise, Nutrition and Health Sciences<br>Andrews, Robert; University of Bristol, Henry Wellcome Laboratories for Integrative |
| <b>Primary Subject Heading</b>: | Diabetes and endocrinology                                                                                                                                                                                                                                                                                                                                                                                                                                    |
| Secondary Subject Heading:      | Nutrition and metabolism                                                                                                                                                                                                                                                                                                                                                                                                                                      |
| Keywords:                       | Type 2 diabetes, Dietary analysis, Dietary change                                                                                                                                                                                                                                                                                                                                                                                                             |
|                                 |                                                                                                                                                                                                                                                                                                                                                                                                                                                               |

SCHOLARONE™  
Manuscripts

only

1  
2  
3 **Dietary changes and associations with metabolic improvements in**  
4 **adults with Type 2 diabetes during a patient-centred dietary**  
5 **intervention: a secondary analysis**  
6  
7  
8  
9

10 Corresponding author: Clare England. Tel, +44 (0)117 331 1096. Fax +44(0)117 954 6756. e-  
11 mail: clare.england@bristol.ac.uk.  
12

13  
14 Authors: C. Y., England<sup>1</sup>, J. L., Thompson<sup>3</sup>, R., Jago<sup>1</sup>, A. R., Cooper<sup>1</sup>, R. C. Andrews<sup>2</sup>  
15  
16

17 The study was carried out at The University of Bristol, Senate House, Tyndall Avenue,  
18 Bristol BS8 1TH  
19

20  
21 1. Centre for Exercise Nutrition and Health Sciences, School for Policy Studies, 8 Priory  
22 Road, University of Bristol, BS8 1TZ  
23

24  
25 2. School of Clinical Sciences, University of Bristol, Learning and Research, Southmead  
26 Hospital  
27

28  
29 Bristol BS10 5NB  
30

31  
32 3. University of Birmingham, School of Sport, Exercise & Rehabilitation Sciences,  
33 Edgbaston, Birmingham, B15 2TT  
34

35  
36 Running title: Dietary change in adults with Type 2 diabetes  
37

38 *Keywords: Type 2 diabetes, dietary analysis, dietary change*  
39  
40  
41  
42

43  
44 Bath Research Ethics Committee (05/Q2001/5)  
45

46 Word count  
47

48 Abstract: 299  
49

50 Main text: 3758  
51

52  
53 Number of tables: 3  
54  
55  
56  
57  
58  
59  
60

1  
2  
3 1 Abstract  
4

5 2 *Objectives:* Examine dietary changes reported during a non-prescriptive dietary intervention  
6  
7 3 and explore whether these changes had a role in observed improvements in HbA1c, weight,  
8  
9 4 lipids and blood pressure.

10  
11 5 *Design:* Secondary analysis of data from the Early ACTivity in Diabetes randomised  
12  
13 6 controlled trial.

14  
15 7 *Participants* 262 patients with newly diagnosed Type 2 diabetes randomised to the dietary  
16  
17 8 intervention.

18  
19 9 *Outcomes and analysis:* Changes in energy intake, macronutrients, fibre and alcohol and in  
20  
21 10 weight, waist circumference, lipids, HbA1c and blood pressure at baseline and 6 months.  
22  
23 11 Multivariate models were used to examine associations between dietary changes and  
24  
25 12 metabolic variables.

26  
27 13 *Results:* Men reported reducing mean energy intake from  $1903 \pm 462$ kcal to  $1685$ kcal  $\pm$   
28  
29 14  $439$ kcal ( $p < 0.001$ ), increasing carbohydrate intake from  $42.4 \pm 6.6\%$  to  $43.8 \pm 6.6\%$   
30  
31 15 ( $p = 0.002$ ) and reducing alcohol intake from  $18 \pm 20$ g to  $11 \pm 14$ g ( $p < 0.001$ ). Women reported  
32  
33 16 reducing mean energy intake from  $1582 \pm 379$ kcal to  $1409 \pm 326$ kcal ( $p < 0.001$ ) with no  
34  
35 17 change to macronutrient distribution and no reduction in alcohol. Fibre intake was  
36  
37 18 maintained. In men ( $n = 148$ ) weak and clinically insignificant associations were found  
38  
39 19 between increased carbohydrates and reduction in HbA1c ( $\beta = -0.003$  [-0.006, -0.001];  
40  
41 20  $p = 0.009$ ), increased fibre and reduction in total cholesterol ( $\beta = -0.023$  [-0.044, -0.002];  
42  
43 21  $p = 0.033$ ), decreased total fat and reduction in LDL-cholesterol ( $\beta = 0.024$  [0.006, 0.001];  
44  
45 22  $p = 0.011$ ), and decreased alcohol and reduction in diastolic blood pressure ( $\beta = 0.276$  [0.055,  
46  
47 23  $0.497$ ];  $p = 0.015$ ). In women ( $n = 75$ ) associations were found between a decrease in trans-fats  
48  
49 24 and reductions in waist circumference ( $\beta = -0.029$  [0.006, 0.052];  $p = 0.015$ ), total cholesterol  
50  
51 25 ( $\beta = 0.399$  [0.028, 0.770];  $p = 0.036$ ) and LDL cholesterol ( $\beta = 0.365$  [0.042, 0.668];  $p = 0.028$ ).

52  
53 26 *Conclusion:* Clinically significant metabolic improvements observed in a patient-centred  
54  
55 27 dietary intervention are not explained by changes in percentage intake of macronutrients.  
56  
57 28 However, a non-prescriptive approach may promote a reduction in total energy intake whilst  
58  
59 29 maintaining fibre consumption.  
60

1  
2  
3 30 Article summary  
4

5 31 Strengths and limitations  
6  
7

- 8 32 • Describes the dietary intake of people soon after diagnosis of Type 2 DM living in the  
9 33 UK, the dietary changes made during a dietary intervention and examines associations  
10 34 between dietary changes and changes in metabolic outcomes. This intervention was  
11 35 based on the dietary advice that is given in routine clinical practice in the UK.  
12 36  
13 37 • Only 53% of the participants provided food diary data at the end of the trial and these  
14 38 people showed greater improvements in metabolic outcomes than those who did not  
15 39 return food diaries. It is probable that they were more motivated than a typical patient  
16 40 group and this limits the generalizability of the findings.  
17  
18  
19  
20  
21  
22  
23  
24  
25  
26  
27  
28  
29  
30  
31  
32  
33  
34  
35  
36  
37  
38  
39  
40

1  
2  
3 41 Introduction  
4  
5

6 42 Dietary management is recognised as highly important in the treatment of Type 2 diabetes  
7 43 (Type 2 DM). Based upon meta-analyses of exercise and diet studies, the American Diabetes  
8 44 Association (ADA) and European Association for the Study of Diabetes (EASD) recommend  
9 45 that lifestyle interventions should be initiated as the first step in treating new-onset Type 2  
10 46 DM [1]. Over the last 3 years, The Look Ahead research group, the Lifestyle Over and Above  
11 47 Drugs in Diabetes (LOADD) and Early Activity in Diabetes (Early ACTID) randomised  
12 48 controlled trials (RCTs) have shown that dietary interventions which target weight reduction  
13 49 are beneficial and improve glycaemic control [2-4]. These trials achieved reductions in  
14 50 HbA1c comparable to reductions demonstrated in patients starting metformin or a gliptin as  
15 51 monotherapies [5] and, although the Look Ahead trial showed no reduction in cardiovascular  
16 52 events after 9.6 years, participants in the intervention arm were less likely to be treated with  
17 53 insulin [6].  
18  
19

20 54  
21 55 The effect of specific dietary changes on metabolic outcomes is still, unclear and no single  
22 56 'diet for diabetes' has been identified [7]. In recognition of this both the 2012 ADA and  
23 57 EASD joint guidelines and 2011 Diabetes UK nutritional guidelines emphasise the  
24 58 importance of an individualised, patient-centred approach to diet rather than a prescriptive  
25 59 approach [1 8]. Few studies have looked at what changes are made in response to this type of  
26 60 dietary advice and how these impact on metabolic control.  
27  
28

29 61  
30 62 The Early ACTID trial included a non-prescriptive, patient-centred dietary intervention. The  
31 63 trial aimed to assess whether adding physical activity to a dietary intervention produced  
32 64 greater benefit than diet alone or usual care in individuals newly diagnosed with Type 2 DM  
33 65 [4]. Participants who received the lifestyle interventions had better HbA1c, lower body  
34 66 weight, less insulin resistance, and were on less medication than the control group at 6 and 12  
35 67 months.  
36  
37

38 68 The aim of this paper is to describe baseline energy and macronutrient intakes and the  
39 69 reported changes made by men and women newly diagnosed with Type 2 DM who were  
40 70 enrolled into the dietary intervention in the Early ACTID study. The associations between  
41 71 changes to energy, macronutrients and metabolic outcomes were explored to determine the  
42 72 effect of dietary changes on the metabolic variables.  
43  
44  
45  
46  
47  
48  
49  
50  
51  
52  
53  
54  
55  
56  
57  
58  
59  
60

73 There is evidence that men and women living in the UK have differing dietary patterns [9].  
74 Men have been reported to drink more alcohol and consume more meat but less fruit and diet  
75 soft drinks than women [10]. Based on this evidence, we hypothesised that men and women  
76 with Type 2 DM would make different dietary changes in response to the dietary intervention  
77 and so gender differences were also examined.

## 78 Subjects and methods

### 79 *Subjects*

80 This paper is a secondary analysis of data from the Early ACTID randomised controlled trial.  
81 Early ACTID was a diet and physical activity trial involving patients living in the South West  
82 of England who were recruited within 5 to 8 months of a diagnosis of Type 2 DM from  
83 December 2005 to September 2008. Full trial procedures with the CONSORT diagram and  
84 results are described elsewhere [4 11 12].

### 85 *Overview of the dietary intervention*

86 Patients in the diet alone and the diet and physical activity groups received the same dietary  
87 intervention. For the first 6 months the intervention aimed to promote dietary change. At  
88 randomisation patients attended a one-hour appointment with a study dietitian followed by 2  
89 further visits of 30 minutes. These visits were supported by 6 additional visits with a research  
90 nurse, where 15 minutes were used to discuss dietary matters for both groups, reinforcing  
91 dietary goals, and 15 minutes to discuss physical activity or other matters pertinent to the  
92 patient, depending upon intervention group. Maintenance was the primary goal of the second  
93 6 months and consisted of 2 more 30 minute dietitian visits and 4 additional visits with the  
94 research nurses.

95 The dietary intervention was based upon the 2003 Diabetes UK healthy eating guidelines [13]  
96 and employed goal oriented motivational interviewing [14]. Patients were encouraged to  
97 discuss their reasons for change, any ambivalence about change and to set their own dietary  
98 goals and identify their own strategies for achieving these goals. Prescriptive daily  
99 requirements for energy or macronutrients were not calculated unless requested by the patient  
100 and prescriptive meal plans or food lists were not used. Instead patients received study  
101 specific written dietary information at each visit (available here:  
102 <http://jcrubristol.org.uk/EA/ACTID%20patients%20Handbook/Forms/AllItems.aspx>) and

1  
2  
3 103 were encouraged to use this to evaluate their own eating habits. The materials included  
4 104 information on maintaining a regular meal pattern and including starchy carbohydrates as a  
5 105 part of each meal, reducing total, saturated and *trans* fat intake, limiting non-milk extrinsic  
6 106 sugars, aiming for 5 portions a day of fruit and vegetables and gave guidance on portion  
7 107 control. The benefit of aiming for a 5 to 10% weight loss by reducing overall energy intake  
8 108 was discussed with everyone. Goals were reviewed at each appointment and successes,  
9 109 difficulties and new strategies discussed. Patients were encouraged to self-monitor their  
10 110 weight and diet.

### 111 *Measurements*

112 Measures were taken at baseline (prior to randomisation) and repeated 6 and 12 months later.  
113 Baseline and 6 month data were used in the current analysis, since outcomes at 6 months  
114 were defined as the primary endpoint of the study. Measurements used in this analysis were  
115 weight, height (to calculate body mass index (BMI)), waist circumference, blood pressure,  
116 HbA1c, fasting lipids and minutes of moderate to vigorous physical activity (MVPA)  
117 measured using accelerometry and defined as activity expending greater than 3kcal/kg/hour .  
118 As previously described, blood measurements and anthropometric measures were carried out  
119 using standardised procedures [11]. Smoking habits and use of dietary supplements were  
120 assessed by a research nurse. The UK Index of Multiple Deprivation (IMD) 2007 was  
121 calculated from home postcode and used as an indicator of socio-economic position [15].

### 122 *Dietary assessment and analysis*

123 Patients in the intervention arms were asked to complete 4-day food diaries prior to each  
124 dietitian appointment, recording all foods and drinks consumed during those 4 days. Portion  
125 sizes were estimated using household measures and package weights and brands indicated  
126 where appropriate. The diaries were discussed during the appointments and used to identify  
127 potential areas for change, difficulties in making change, and for patients to observe change  
128 in their diets over time. Patients were asked to return all the diaries at the final visit for  
129 further analysis. Those who did not return diaries at the visit were reminded by telephone and  
130 e-mail to post outstanding diaries to the research team after the visit.

131 Baseline and 6-month food diaries were coded by one coder and checked for accuracy and  
132 agreement by a second coder, using the dietary coding programme Diet in Data Out (DIDO),

1  
2  
3 133 developed at the Medical Research Council Human Nutrition Unit in Cambridge, UK [16].  
4 134 Diaries were analysed with the nutrient analysis programme Bristol General Analysis of  
5 135 Dietary Experiments (BRIGADE) [17]. The nutrient database is based on *McCance and*  
6 136 *Widdowson's Composition of Foods, 5<sup>th</sup> edition* [18], updated with the supplements to that  
7  
8 137 edition, new data from the 6<sup>th</sup> edition and manufacturers' data. Additional nutrient data from  
9  
10 138 the INTERMAP nutrient database for the UK were also used [19]. If no portion size  
11  
12 139 information was given, age-appropriate portion sizes were assigned [20]. The mean daily  
13  
14 140 consumption of each nutrient was calculated for each participant.

### 17 141 *Statistical analysis*

18  
19  
20 142 As the dietary intervention was designed to be identical for both intervention groups and  
21  
22 143 there were no difference in outcomes between the diet and diet and physical activity groups,  
23  
24 144 the data were analysed as a cohort. Patients in the usual care group were excluded from the  
25  
26 145 analysis since they did not receive the dietary intervention and were not asked to complete a  
27  
28 146 diary at 6 months. Descriptive statistics were used for patient characteristics and for intakes  
29  
30 147 of macronutrients at baseline and 6 months. Variables were checked for normal distribution;  
31  
32 148 non-normal variables were log transformed prior to analysis. For ease of interpretation,  
33  
34 149 arithmetic means and back transformed variables are presented. Independent *t*-tests were used  
35  
36 150 to explore differences in continuous variables between men and women at baseline and  
37  
38 151 between those who did and did not return food diaries, and chi-squared tests were used to  
39  
40 152 explore differences in dichotomous variables. Paired sample *t*-tests were used to describe  
41  
42 153 differences in energy and macronutrient intake between baseline and 6 months. McNemar  
43  
44 154 tests were used to explore differences in numbers of people meeting recommendations at  
45  
46 155 baseline and 6 months. As alcohol variables could not be transformed, the Mann Whitney U  
47  
48 156 and paired sample Wilcoxon signed rank test were used to describe differences. Cases with  
49  
50 157 missing data were excluded listwise.

51  
52 158 Multivariate regression models were used to investigate associations between changes in  
53  
54 159 energy and macronutrient intake and the metabolic variables at 6 months in those who  
55  
56 160 provided valid physical activity data. Change in energy intake was explored using a standard  
57  
58 161 multivariate model. Each macronutrient was explored independently using a multivariate  
59  
60 162 nutrient density model to adjust for change in energy intake. Change in percentage energy  
163  
164 from each macronutrient was calculated and entered into the model with change in total



1  
2  
3 164 energy included as a covariate. Change in fibre intake was explored using a standard  
4  
5 165 multivariate model and entered as an absolute intake (in grams) with change to total energy  
6  
7 166 intake as a covariate [21]. Models were adjusted for age, BMI, time since diagnosis, minutes  
8  
9 167 of moderate to vigorous physical activity (MVPA) and dichotomous yes/no variables for  
10  
11 168 smoking status, relevant lipid lowering, blood pressure and diabetes medication and dietary  
12  
13 169 supplement use.

14 170 Due to the number of different analyses that were conducted the results are interpreted in  
15  
16 171 terms of strength of evidence of associations [22]. This is an exploratory analysis and as such  
17  
18 172 has not been adjusted for multiple comparisons, consequently p values of <0.05 are  
19  
20 173 interpreted as some evidence of association,  $p < 0.01$  as increasing evidence and  $p < 0.001$  as  
21  
22 174 strong evidence.

## 23 175 Results

### 24 176 *Study participants*

25  
26  
27  
28 177 A total of 593 patients were recruited into the Early ACTID study, with 494 being assigned to  
29  
30 178 one of the intervention groups. 396 (80%) patients were recorded as completing food diaries  
31  
32 179 at both baseline and 6 months but only 262 (53%) patients returned them, and 223 of these  
33  
34 180 had valid accelerometry data at both time points. At 6 months 491 (99%) patients assigned to  
35  
36 181 one of the intervention arms remained in the study, with 434 (88%) attending all scheduled  
37  
38 182 visits up to that point and a further 37 (8%) attending all except one.

39 183 Mean age was 62.4 (9.0) years, 97% of patients were white, 83% were married or with a long  
40  
41 184 term partner and 41% were in the lowest IMD quartile. 40% of participants were on oral  
42  
43 185 hypoglycaemic medication, 65% on lipid lowering medication and 66% on blood pressure  
44  
45 186 medication. Only 6% of patients were current smokers at baseline. Men and women had  
46  
47 187 similar characteristics, although there was some evidence that men were more likely to be on  
48  
49 188 lipid lowering medication than women (69% vs. 56%,  $p = 0.041$ ).

50 189 Compared to the patients who did not return food diaries, those who did were older (62 years  
51  
52 190 vs 57 years,  $p < 0.001$ ), with a lower mean weight (88.2 kg vs 93.3 kg,  $p = 0.001$ ), lower mean  
53  
54 191 BMI (30.7 vs 32.5,  $p = 0.001$ ) and lower mean waist circumference (105 cm vs 108 cm,  
55  
56 192  $p = 0.025$ ), but there was no difference in glycaemic control, lipids and blood pressure.

1  
2  
3 193 *Metabolic outcomes*  
4

5 194 Table 1 shows the metabolic outcomes at baseline and 6 months for those who returned food  
6 diaries. There was no difference in glycaemic control or blood pressure between men and  
7 195 women, but women had higher total (p<0.001), LDL (p<0.001) and HDL (p=0.015)  
8 196 cholesterol levels.  
9 197

10  
11  
12 198 Weight, waist circumference and BMI improved at 6 months for both men and women  
13 (p<0.001). Men and women improved their HbA1c (men: p=0.006; women: p<0.001). Men  
14 199 improved their fasting blood glucose (p=0.006) and there is some evidence that women  
15 200 increased their HDL cholesterol (p=0.033).  
16 201

17  
18  
19 202 At 6 months those who returned food diaries had lost more weight (2.4 kg vs 1.3 kg,  
20 p=0.001), reduced waist circumference more (2.7 cm vs 1.3 cm, p=0.022) and reduced  
21 203 HbA1c (0.18% (2 mmol/l) vs 0% (0 mmol/l), p=0.02).  
22 204

23  
24  
25 205 *Nutrient analysis*  
26

27  
28  
29 206 Table 2 shows the mean reported energy and nutrient intakes at baseline and 6 months and  
30 207 their mean reported changes.  
31

32  
33 208 At baseline participants reported generally good dietary habits. 61% of women and 59% of  
34 209 men reported the recommended total fat intake (less than 35% of energy from total fat) and  
35 210 55% of women and 66% of men reported a low to moderate carbohydrate intake (<45% of  
36 211 energy). Men were more likely to drink alcohol and more likely to drink to excess than  
37 212 women with 49% of women and 28% of men recording no alcohol during the 4 days and 8%  
38 213 of women and 19% of men reporting more than 30g of alcohol per day (p=0.022).  
39

40  
41  
42 214 At 6 months mean daily reported energy intake was reduced by 187 kcal (p<0.001). Men  
43 215 reduced their energy intake more than women (218 ± 332 vs. 123 ± 270 kcal/day, p=0.022).  
44 216 This was achieved by small reductions in all macronutrients, whilst maintaining fibre intake.  
45 217 The mean percentage energy from macronutrients was unchanged for women whilst men  
46 218 reported a small mean increase of 1.4 ± 5.9% (p<0.001) of energy from carbohydrates. Men  
47 219 reported reducing mean alcohol intake (p<0.001), with 40% reporting no alcohol during the 4  
48 220 days and 15% reporting more than 30g per day. There was no reported mean change in  
49 221 alcohol intake for women. Despite no mean change to energy from saturated fat, more men  
50  
51  
52  
53  
54  
55  
56  
57  
58  
59  
60

222 met recommendations at 6 months (35% men at baseline vs. 49% at 6 months reporting less  
223 than 10% energy from saturated fat,  $p=0.007$ ). There was no change in the number of women  
224 meeting recommendations (40% baseline vs 44% at 6 months,  $p=0.71$ ).

225 Table 3 shows the regression coefficients and confidence intervals for changes in energy and  
226 macronutrients that show evidence for associations with specific metabolic variables. In men  
227 a 1% reduction in energy from alcohol was associated with a 0.276 mmHg reduction in  
228 diastolic blood pressure (95% CI= 0.055 to 0.497). In women a 1% reduction in energy from  
229 trans-fat was associated with a decrease in cholesterol of 0.399 mmol/l (95% CI= 0.028 to  
230 0.770). In men a 1% increase in energy from carbohydrate was associated with a decrease in  
231 HbA1c of 0.003% (95% CI= -0.006 to -0.001). There were no associations between change  
232 in energy intake and the metabolic variables.

233

## 234 Discussion

### 235 *Main findings*

236 The main findings from this analysis are that patients who were randomised to the  
237 intervention arms in the Early ACTID study and returned food diaries reported a good diet at  
238 baseline but still achieved small dietary changes. They reported a mean decrease in energy  
239 intake of around 200 kcal per day, during the first 6 months. Men reported a reduced alcohol  
240 intake that produced a greater reduction in energy and reported a small increase in the  
241 percentage energy from carbohydrate. Women reported modest reductions to all  
242 macronutrients but made no changes to alcohol, their energy reduction was less and the  
243 macronutrient ratio of their diets did not change. Both sexes maintained fibre intake.  
244 Although changes in percentage intake of macronutrients were associated with metabolic  
245 outcomes, these effect sizes were too small to be of clinical significance. These results  
246 suggest that current recommendations that dietary advice is personalised, flexible and focuses  
247 on realistic, achievable, and sustainable reductions in intake may promote dietary change in  
248 people with T2 DM.

### 249 *Comparison with other studies*

1  
2  
3 250 The Early ACTID dietary intervention was a pragmatic, ‘real world’ intervention, in which  
4  
5 251 participants discussed dietary advice with dietitians and nurses to decide on their own dietary  
6  
7 252 changes. The approach contrasts with dietary studies where participants are asked to make  
8  
9 253 specific, prescribed changes to the macronutrient composition, by lowering carbohydrate and  
10  
11 254 increasing protein [23-25] or to lower the glycaemic index [26 27]. The LOADD trial [3]  
12  
13 255 based a successful dietary intervention in patients with poor glycaemic control on very  
14  
15 256 similar recommendations to those used in the Early ACTID intervention, but total energy  
16  
17 257 intake and macronutrient ratios for each participant were calculated and diets were prescribed  
18  
19 258 according to these calculations. The Early ACTID intervention did not compare a prescriptive  
20  
21 259 with a non-prescriptive approach so cannot be used to demonstrate that this is superior but  
22  
23 260 reductions in weight, waist circumference and HbA1c were achieved that are comparable to  
24  
25 261 those achieved during these interventions. Withdrawal rates for prescriptive dietary  
26  
27 262 interventions range from 10% to 30% and these higher withdrawal rates may suggest that in  
28  
29 263 routine clinical care a more flexible approach can be advantageous in promoting retention. Of  
30  
31 264 those participants in Early ACTID who either did not attend all appointments or withdrew  
32  
33 265 completely, only one person stated that they did not see the benefit of the trial. The majority  
34  
35 266 could not schedule all 9 dietitian and nurse visits because of other commitments, 5 cited other  
36  
37 267 health issues, 3 moved too far away, 1 said they ‘did not want to diet,’ 1 wanted to take  
38  
39 268 orlistat from baseline and 3 gave no reasons. What is common to intervention trials in  
40  
41 269 diabetes is that patients receive individual support and attend multiple appointments with a  
42  
43 270 dietitian or a health practitioner who is expert in promoting dietary change. It is important to  
44  
45 271 emphasise that this model is not routinely replicated in primary care for patients with Type 2  
46  
47 272 DM.

48  
49 273 The associations between specific dietary changes and metabolic outcomes have not, as far as  
50  
51 274 we are aware, previously been examined in patients with Type 2 DM. Effect sizes were small  
52  
53 275 and not clinically significant but they are consistent with existing nutritional data on the  
54  
55 276 benefits of a reduction in trans fats on lipids and waist circumference [28], an increase in  
56  
57 277 fibre on LDL cholesterol [29] and a reduction in alcohol and blood pressure [30]. It is of  
58  
59 278 interest that this analysis found that there was no benefit in carbohydrate reduction in men  
60  
279 with good glycaemic control who are already consuming a low to moderate carbohydrate  
280  
281 diet. It is not possible to determine whether there is an optimum macronutrient distribution  
for T2 DM from this analysis, particularly in those with poor glycaemic control, but there is

1  
2  
3 282 no unequivocal evidence that low carbohydrate diets produce better blood glucose control or  
4 283 weight loss than higher carbohydrate diets [31]. A meta-analysis of low carbohydrate diets  
5 284 versus low fat diets conducted in 2012 [32] concluded that there was evidence of a small but  
6 285 beneficial effect on lipid profiles of a low (defined as <45% energy from carbohydrate) or  
7 286 very low carbohydrate (<60g carbohydrate) diet but no difference in improvements to weight  
8 287 or glycaemic control.

### 13 288 *Strengths and weaknesses*

16 289 To our knowledge this is the first study to describe the dietary intake of people soon after  
17 290 diagnosis with Type 2 DM living in the UK, the dietary changes made during an intervention  
18 291 based on patient-centred, non-prescriptive dietary advice and that examines associations  
19 292 between dietary change and metabolic variables. The demographics of the Early ACTID  
20 293 participants included in this analysis suggest that these findings are only representative of the  
21 294 white population; however the sample is socio-economically diverse with 40% of participants  
22 295 living in areas of high economic deprivation.

26 296 The study has important weaknesses. Only 53% of the participants returned baseline and 6  
27 297 month food diaries at the end of the trial and these people had a lower BMI and waist  
28 298 circumference at baseline and achieved greater metabolic improvements. The participants  
29 299 who did not return diaries reported mislaying them which may indicate less motivation and  
30 300 less engagement with the trial. Participants who did return diaries could have been more  
31 301 motivated to make dietary changes than a typical patient population, and, given that their  
32 302 diets were good at baseline, may already have made dietary changes prior to entry into the  
33 303 Early ACTID study. The relative lack of dietary data limits our ability to generalise these  
34 304 findings to broader patient groups.

37 305 The use of any self-reported measure of diet, including 4-day food diaries, is a recognised  
38 306 limitation in dietary studies. Under-reporting of food intake and selective under-reporting or  
39 307 under-eating of foods perceived to be 'bad' are commonly documented, especially in people  
40 308 who are obese [33 34]. Methods exist to estimate under-reporting, using calculated basal  
41 309 metabolic rate and estimates of physical activity [35 36] but these methods assume that an  
42 310 individual's weight is stable and are consequently inappropriate for use during a weight loss  
43 311 trial. It should be noted that other dietary interventions in patients with Type 2 DM have  
44 312 reported similar energy intakes [23 26] and an energy reduction of around 200kcal/day is

1  
2  
3 313 plausible assuming a dynamic model of energy balance [37] and given the modest weight  
4 314 reduction observed. It is also important to note that this is a secondary analysis so cause and  
5  
6 315 effect cannot be assumed.  
7

8  
9 316 *Conclusion*

10  
11 317 The Early ACTID trial indicates that a flexible, non-prescriptive approach to dietary advice  
12 318 based on standard healthy eating guidelines in Type 2 DM given soon after diagnosis may be  
13 319 effective in promoting small dietary change, even in patients with good glycaemic control.  
14  
15 320 This supports current clinical practice and guidelines. The current analysis suggests that  
16 321 changes in percentage intake of macronutrients did not have any clinically significant effect  
17 322 on metabolic outcomes during the trial but this needs confirmation in a larger cohort, with  
18 323 less good glycaemic control. Further research is needed on whether dietary changes made  
19 324 using a non-prescriptive approach are sustainable and beneficial in the longer term in a more  
20 325 typical patient population.  
21  
22  
23  
24  
25  
26  
27  
28  
29  
30  
31  
32  
33  
34  
35  
36  
37  
38  
39  
40  
41  
42  
43  
44  
45  
46  
47  
48  
49  
50  
51  
52  
53  
54  
55  
56  
57  
58  
59  
60

### Acknowledgements

We would like to acknowledge the participants in the Early ACTID trial, members of the Early ACTID team and steering committee, Dr Pauline Emmett for advice on dietary analysis, Dr Rosemary Greenwood for advice on statistical analysis and Professor Debbie Sharp for assistance in manuscript preparation.

### Funding

The Early ACTID trial was supported by Diabetes UK, the UK Department of Health and Western Comprehensive Local Research Network. Pilot dietary analysis was supported by the Above and Beyond Foundation. C.Y. England is supported by NIHR Clinical Doctoral Research Fellowship 10-017.

### Authors' contributions

This work forms part of the PhD of CYE which is supervised by RCA, JLT and RJ. RCA led the Early ACTID study and advised on clinical application of this work. CYE participated in data collection, data entry and was responsible for data analysis with guidance from JLT and RJ. ARC was responsible for the design of the ACTID physical activity intervention and for processing and analysis of the physical activity data. The first draft of the manuscript was prepared by CYE with critical input and revisions by all other authors. All authors approved the final manuscript.

### Conflicts of interests

The authors declare that they have no conflict of interest



## References

1. Inzucchi S, Bergenstal R, Buse J, et al. Management of hyperglycaemia in type 2 diabetes: a patient-centered approach. Position statement of the American Diabetes Association (ADA) and the European Association for the Study of Diabetes (EASD). *Diabetologia* 2012;**55**(6):1577-96 doi: 10.1007/s00125-012-2534-0[published Online First: Epub Date]].
2. Wing RR, Lang W, Wadden TA, et al. Benefits of Modest Weight Loss in Improving Cardiovascular Risk Factors in Overweight and Obese Individuals With Type 2 Diabetes. *Diabetes Care* 2011;**34**(7):1481-86 doi: 10.2337/dc10-2415[published Online First: Epub Date]].
3. Coppel KJ, Kataoka M, Williams SM, Chisholm AW, Vorgers SM, Mann JI. Nutritional intervention in patients with type 2 diabetes who are hyperglycaemic despite optimised drug treatment - Lifestyle Over and Above Drugs in Diabetes (LOADD) study: randomised controlled trial. *BMJ* 2010;**341** doi: 10.1136/bmj.c3337[published Online First: Epub Date]].
4. Andrews RC, Cooper AR, Montgomery AA, et al. Diet or diet plus physical activity versus usual care in patients with newly diagnosed type 2 diabetes: the Early ACTID randomised controlled trial. *Lancet* 2011;**378**(9786):129-39
5. Aschner P, Katzeff HL, Guo H, et al. Efficacy and safety of monotherapy of sitagliptin compared with metformin in patients with type 2 diabetes. *Diabetes Obes. Metab.* 2010;**12**(3):252-61 doi: 10.1111/j.1463-1326.2009.01187.x[published Online First: Epub Date]].
6. The Look AHEAD Research Group. Cardiovascular Effects of Intensive Lifestyle Intervention in Type 2 Diabetes. *N. Engl. J. Med.* 2013;**369**(2):145-54 doi: doi:10.1056/NEJMoa1212914[published Online First: Epub Date]].
7. Franz MJ, Powers MA, Leontos C, et al. The Evidence for Medical Nutrition Therapy for Type 1 and Type 2 Diabetes in Adults. *J. Am. Diet. Assoc.* 2010;**110**(12):1852-89 doi: 10.1016/j.jada.2010.09.014[published Online First: Epub Date]].
8. Dyson PA, Kelly T, Deakin T, et al. Diabetes UK evidence-based nutrition guidelines for the prevention and management of diabetes. *Diabetic. Med.* 2011;**28**(11):1282-88 doi: 10.1111/j.1464-5491.2011.03371.x[published Online First: Epub Date]].
9. Northstone K, Emmett PM. Dietary patterns of men in ALSPAC: associations with socio-demographic and lifestyle characteristics, nutrient intake and comparison with women's dietary patterns. *Eur J Clin Nutr* 2010;**64**(9):978-86
10. Hoare J, Henderson L, Bates CJ. National Diet and Nutrition Survey: adults aged 19 to 64 years. Volume 5: Summary report., 2004.
11. Cooper A, Sebire S, Montgomery A, et al. Sedentary time, breaks in sedentary time and metabolic variables in people with newly diagnosed type 2 diabetes. *Diabetologia* 2012;**55**(3):589-99 doi: 10.1007/s00125-011-2408-x[published Online First: Epub Date]].
12. Malpass A, Andrews R, Turner KM. Patients with Type 2 Diabetes experiences of making multiple lifestyle changes: A qualitative study. *Patient Educ. Couns.* 2009;**74**(2):258-63 doi: 10.1016/j.pec.2008.08.018[published Online First: Epub Date]].
13. Connor H, Annan F, Bunn E, et al. The implementation of nutritional advice for people with diabetes. *Diabetic. Med.* 2003;**20**(10):786-807
14. Miller WR. Motivational interviewing: research, practice, and puzzles. *Addict. Behav.* 1996;**21**(6):835-42 doi: 0306460396000445 [pii][published Online First: Epub Date]].
15. Social Disadvantage Research Centre. The English Indices of Deprivation 2004. In: Research DoSPaS, ed. Oxford: Communities and Local Government, 2004:14 - 42.
16. Price GM, Paul AA, Key FB, et al. Measurement of diet in a large national survey: comparison of computerized and manual coding of records in household measures. *J. Hum. Nutr. Diet.*



- 1995;**8**(6):417-28 doi: 10.1111/j.1365-277X.1995.tb00337.x[published Online First: Epub Date]].
17. Cowin I, Emmett P, the ALSPAC study team. Diet in a group of 18-month-old children in South West England, and comparison with the results of a national survey. *J. Hum. Nutr. Diet.* 2000;**13**(2):87-100 doi: 10.1046/j.1365-277x.2000.00220.x[published Online First: Epub Date]].
18. Holland B, Welch AA, Unwin ID, Buss DH, Paul AA, Southgate DAT. *McCance and Widdowson's The Composition of Foods*. 5th Edition ed. Cambridge: Royal Society of Chemistry, 1991.
19. Dennis B, Stamler J, Buzzard M, et al. INTERMAP: the dietary data--process and quality control. *J. Hum. Hypertens.* 2003;**17**(9):609-22
20. Wreiden WL, Barton KL. Calculation and Collation of Typical Food Portion Sizes for Adults Aged 19-64 and Older People Aged 65 and Over. Final Technical Report to the Food Standards Agency. Available from [http://www.foodbase.org.uk/results.php?f\\_report\\_id=82](http://www.foodbase.org.uk/results.php?f_report_id=82) 2006
21. Hu FB, Stampfer MJ, Rimm E, et al. Dietary fat and coronary heart disease: a comparison of approaches for adjusting for total energy intake and modeling repeated dietary measurements. *American Journal of Epidemiology* 1999;**149**(6):531-40
22. Sterne JAC, Cox DR, Smith GD. Sifting the evidence—what's wrong with significance tests? Another comment on the role of statistical methods. *BMJ* 2001;**322**(7280):226-31 doi: 10.1136/bmj.322.7280.226[published Online First: Epub Date]].
23. Krebs J, Elley C, Parry-Strong A, et al. The Diabetes Excess Weight Loss (DEWL) Trial: a randomised controlled trial of high-protein versus high-carbohydrate diets over 2 years in type 2 diabetes. *Diabetologia* 2012;**55**(4):905-14 doi: 10.1007/s00125-012-2461-0[published Online First: Epub Date]].
24. Larsen RN, Mann NJ, Maclean E, Shaw JE. The effect of high-protein, low-carbohydrate diets in the treatment of type 2 diabetes: a 12 month randomised controlled trial. *Diabetologia* 2011;**54**(4):731-40
25. Guldbrand H, Dizdar B, Bunjaku B, et al. In type 2 diabetes, randomisation to advice to follow a low-carbohydrate diet transiently improves glycaemic control compared with advice to follow a low-fat diet producing a similar weight loss. *Diabetologia* 2012:1-10 doi: 10.1007/s00125-012-2567-4[published Online First: Epub Date]].
26. Jenkins DJ, Kendall CW, McKeown-Eyssen G, et al. Effect of a low-glycemic index or a high-cereal fiber diet on type 2 diabetes: a randomized trial. *JAMA: Journal of the American Medical Association* 2008;**300**(23):2742-53
27. Wolever TM, Gibbs AL, Mehling C, et al. The Canadian Trial of Carbohydrates in Diabetes (CCD), a 1-y controlled trial of low-glycemic-index dietary carbohydrate in type 2 diabetes: no effect on glycated hemoglobin but reduction in C-reactive protein. *Am. J. Clin. Nutr.* 2008;**87**(1):114-25 doi: 87/1/114 [pii][published Online First: Epub Date]].
28. Bhardwaj S, Passi SJ, Misra A. Overview of trans fatty acids: Biochemistry and health effects. *Diabetes & Metabolic Syndrome: Clinical Research & Reviews* 2011;**5**(3):161-64 doi: 10.1016/j.dsx.2012.03.002[published Online First: Epub Date]].
29. Babio N, Balanza R, Basulto J, Bullo M, Salas-Salvado J. Dietary fibre: influence on body weight, glycemic control and plasma cholesterol profile. *Nutr. Hosp.* 2010;**25**(3):327-40
30. McFadden CB, Brensinger CM, Berlin JA, Townsend RR. Systematic review of the effect of daily alcohol intake on blood pressure. *Am. J. Hypertens.* 2005;**18**(2):276-86 doi: 10.1016/j.amjhyper.2004.07.020[published Online First: Epub Date]].
31. Castaneda-Gonzalez LM, Bacardi Gascon M, Jimenez Cruz A. Effects of low carbohydrate diets on weight and glycemic control among type 2 diabetes individuals: a systemic review of RCT

- 1  
2 greater than 12 weeks. *Nutr. Hosp.* 2011;**26**(6):1270-6 doi: 10.1590/s0212-  
3 16112011000600013[published Online First: Epub Date]].
- 4 32. Hu T, Mills KT, Yao L, et al. Effects of Low-Carbohydrate Diets Versus Low-Fat Diets on  
5 Metabolic Risk Factors: A Meta-Analysis of Randomized Controlled Clinical Trials. *Am. J.*  
6 *Epidemiol.* 2012;**176**(suppl 7):S44-S54 doi: 10.1093/aje/kws264[published Online First: Epub  
7 Date]].
- 8 33. Karelis AD, Lavoie M-E, Fontaine J, et al. Anthropometric, metabolic, dietary and psychosocial  
9 profiles of underreporters of energy intake: a doubly labeled water study among  
10 overweight/obese postmenopausal women[mdash]a Montreal Ottawa New Emerging Team  
11 study. *Eur. J. Clin. Nutr.* 2010(64):68-74 doi:  
12 <http://dx.doi.org/10.1038/ejcn.2009.119>[published  
13 Online First: Epub Date]].
- 14 34. Goris AH, Westerterp-Plantenga MS, Westerterp KR. Undereating and underrecording of habitual  
15 food intake in obese men: selective underreporting of fat intake. *The American Journal of*  
16 *Clinical Nutrition* 2000;**71**(1):130-34
- 17 35. Black AE. Critical evaluation of energy intake using the Goldberg cut-off for energy intake:basal  
18 metabolic rate. A practical guide to its calculation, use and limitations. *International journal of*  
19 *obesity and related metabolic disorders : journal of the International Association for the Study*  
20 *of Obesity* 2000;**24**(9):1119-30
- 21 36. Rennie KL, Coward A, Jebb SA. Estimating under-reporting of energy intake in dietary surveys  
22 using an individualised method. *Br. J. Nutr.* 2007;**97**(6):1169-76 doi: S0007114507433086  
23 [pii]  
24 10.1017/S0007114507433086[published Online First: Epub Date]].
- 25 37. Hall KD, Sacks G, Chandramohan D, et al. Quantification of the effect of energy imbalance on  
26 bodyweight. *The Lancet* 2011;**378**(9793):826-37 doi: [http://dx.doi.org/10.1016/S0140-  
27 6736\(11\)60812-X](http://dx.doi.org/10.1016/S0140-6736(11)60812-X)[published Online First: Epub Date]].
- 28  
29  
30  
31  
32  
33  
34  
35  
36  
37  
38  
39  
40  
41  
42  
43  
44  
45  
46  
47  
48  
49  
50  
51  
52  
53  
54  
55  
56  
57  
58  
59  
60

Table 1: Metabolic characteristics at baseline and 6 months

| Metabolic characteristics                                         | Baseline                     |                             |                              | 6 months                    |                             |                                           | Change (6 months - baseline)                |                                             |                                             |
|-------------------------------------------------------------------|------------------------------|-----------------------------|------------------------------|-----------------------------|-----------------------------|-------------------------------------------|---------------------------------------------|---------------------------------------------|---------------------------------------------|
|                                                                   | Total (n=262)<br>Mean (SD)   | Women (n=87)<br>Mean (SD)   | Men (n=175)<br>Mean (SD)     | Total (n=262)<br>Mean (SD)  | Women (n=87)<br>Mean (SD)   | Men (n=175)<br>Mean (SD)                  | Total (n=262)<br>Mean (SD)                  | Women (n=87)<br>Mean (SD)                   | Men (n=175)<br>Mean (SD)                    |
| Weight, kg                                                        | 88.2 (16.1)                  | 83.1 (17.9)                 | 90.7 (14.5) <sup>c</sup>     | 85.9 (16.3)                 | 80.7 (17.7)                 | 88.5 (15.0)                               | - 2.3 (3.3) <sup>z</sup>                    | - 2.5 (3.3) <sup>z</sup>                    | - 2.3 (3.3) <sup>z</sup>                    |
| Body mass index, kg/m <sup>2</sup>                                | 30.7 (5.3)                   | 31.9 (6.9)                  | 30.2 (4.7) <sup>a</sup>      | 29.9 (5.4)                  | 30.9 (6.2)                  | 29.4 (4.9)                                | - 0.8 (1.2) <sup>z</sup>                    | - 1 (1.0) <sup>z</sup>                      | - 0.8 (1.1) <sup>z</sup>                    |
| Waist circumference, cm                                           | 105 (12)                     | 102 (13) <sup>1</sup>       | 107 (11) <sup>b</sup>        | 103 (12)                    | 100 (13)                    | 104 (12)                                  | - 3 (4) <sup>z</sup>                        | - 3 (4) <sup>z</sup>                        | - 3 (4) <sup>z</sup>                        |
| HbA1c, %<br>(mmol/l)                                              | 6.66 (0.94)<br>(49.0 (10.3)) | 6.67 (0.91)<br>(49.0 (9.9)) | 6.65 (0.95)<br>(49.0 (10.4)) | 6.47 (0.89)<br>(47.0 (9.7)) | 6.41 (0.63)<br>(47.0 (6.9)) | 6.51 (0.99) <sup>1</sup><br>(48.0 (10.8)) | - 0.18 (0.72) <sup>z</sup><br>(- 2.0 (7.9)) | - 0.27 (0.63) <sup>z</sup><br>(- 3.0 (6.9)) | - 0.14 (0.75) <sup>x</sup><br>(- 1.5 (8.2)) |
| Total cholesterol, mmol/l                                         | 4.33 (0.90)                  | 4.66 (0.89) <sup>1</sup>    | 4.16 (0.86) <sup>1c</sup>    | 4.29 (0.93)                 | 4.66 (0.98)                 | 4.11 (0.84)                               | - 0.03 (0.69)                               | 0.01 (0.79)                                 | - 0.06 (0.63)                               |
| LDL-cholesterol, mmol/l                                           | 2.30 (0.78)                  | 2.55 (0.81) <sup>3</sup>    | 2.18 (0.74) <sup>2c</sup>    | 2.27 (0.81)                 | 2.51 (0.88) <sup>3</sup>    | 2.15 (0.75) <sup>1</sup>                  | - 0.03 (0.67)                               | - 0.03 (0.76)                               | - 0.03 (0.62)                               |
| HDL-cholesterol, mmol/l                                           | 1.29 (0.33)                  | 1.37 (0.39) <sup>1</sup>    | 1.25 (0.29) <sup>1a</sup>    | 1.34 (0.37)                 | 1.45 (0.47)                 | 1.28 (0.30)                               | 0.05 (0.27) <sup>y</sup>                    | 0.09 (0.37) <sup>x</sup>                    | 0.03 (0.21)                                 |
| Systolic blood pressure, mmHg                                     | 134 (16)                     | 133 (16)                    | 134 (15)                     | 134 (15)                    | 135 (16)                    | 134 (14)                                  | 1 (12)                                      | 2 (13)                                      | 0 (12)                                      |
| Diastolic blood pressure, mmHg                                    | 79 (8)                       | 78 (8)                      | 79 (8)                       | 78 (8)                      | 78 (8)                      | 78 (8)                                    | 0 (7)                                       | 0 (8)                                       | 0 (7)                                       |
| Physical activity<br>(n=223)                                      | (n=223)                      | (n=75)                      | (n=148)                      | (n=223)                     | (n=75)                      | (n=148)                                   | (n=223)                                     | (n=75)                                      | (n=148)                                     |
| Minutes of moderate to vigorous<br>physical activity / day (MVPA) | 26 (21)                      | 21 (18)                     | 29 (22)                      | 33 (25)                     | 21 (19)                     | 38 (26)                                   | 7 (21)                                      | 1 (12)                                      | 10 (24)                                     |

a = p<0.05; b = p<0.005; c = p<0.001 women vs. men at baseline

x = p<0.05; y = p<0.005; z = p<0.001 baseline vs. 6 month

Numerical superscripts indicate number of participants with missing data for the variable of interest.

Table 2: Nutrient intake at baseline and 6 months

| Mean daily intake nutrients       | Baseline                   |                           |                          | 6 months                   |                           |                          | Change (6 months - baseline) |                           |                           |
|-----------------------------------|----------------------------|---------------------------|--------------------------|----------------------------|---------------------------|--------------------------|------------------------------|---------------------------|---------------------------|
|                                   | Total (n=262)<br>Mean (SD) | Women (n=87)<br>Mean (SD) | Men (n=175)<br>Mean (SD) | Total (n=262)<br>Mean (SD) | Women (n=87)<br>Mean (SD) | Men (n=175)<br>Mean (SD) | Total (n=262)<br>Mean (SD)   | Women (n=87)<br>Mean (SD) | Men (n=175)<br>Mean (SD)  |
| Energy (kcal)                     | 1796 (461)                 | 1582 (379)                | 1903 (462) <sup>c</sup>  | 1610 (418)                 | 1459 (326)                | 1685 (439) <sup>c</sup>  | -187 (315) <sup>z</sup>      | - 123 (270) <sup>z</sup>  | - 218 (332) <sup>az</sup> |
| Protein (g)                       | 80 (19)                    | 73 (16)                   | 83 (20) <sup>c</sup>     | 74 (19)                    | 68 (13)                   | 77 (20) <sup>c</sup>     | - 6 (17) <sup>z</sup>        | - 5 (15) <sup>y</sup>     | - 6 (19) <sup>z</sup>     |
| Total carbohydrates (g)           | 202 (55)                   | 186 (48)                  | 211 (57) <sup>b</sup>    | 186 (53)                   | 170 (39)                  | 194 (58) <sup>b</sup>    | - 17 (41) <sup>z</sup>       | - 15 (33) <sup>z</sup>    | - 17 (45) <sup>z</sup>    |
| Total sugar (g)                   | 81 (32)                    | 77 (28)                   | 83 (34)                  | 75 (31)                    | 71 (23)                   | 77 (34)                  | - 6 (26) <sup>z</sup>        | - 6 (21) <sup>x</sup>     | - 6 (28) <sup>y</sup>     |
| Starch (g)                        | 119 (36)                   | 105 (30)                  | 126 (37) <sup>c</sup>    | 109 (31)                   | 97 (26)                   | 115 (32) <sup>c</sup>    | -10 (28) <sup>z</sup>        | - 9 (24) <sup>y</sup>     | - 11 (30) <sup>z</sup>    |
| Non-starch polysaccharide (g)     | 17 (5)                     | 16 (5)                    | 17 (5)                   | 16 (5)                     | 15 (4)                    | 17 (5) <sup>a</sup>      | - 1 (5)                      | - 1 (4)                   | 0 (5)                     |
| Total fat (g)                     | 69 (22)                    | 61 (20)                   | 73 (220) <sup>c</sup>    | 61 (20)                    | 56 (19)                   | 64 (20) <sup>b</sup>     | - 8 (18) <sup>z</sup>        | - 5 (17) <sup>x</sup>     | - 9 (18) <sup>z</sup>     |
| Saturated fat (g)                 | 23 (9)                     | 21 (8)                    | 24 (9) <sup>b</sup>      | 20 (9)                     | 19 (9)                    | 21 (9)                   | - 3 (8) <sup>z</sup>         | - 2 (7) <sup>x</sup>      | - 3 (8) <sup>z</sup>      |
| Trans fat (g)                     | 2.3 (1.1)                  | 2.0 (1)                   | 2.4 (1.1) <sup>b</sup>   | 2.1 (1.1)                  | 1.9 (1.1)                 | 2.2 (1.1) <sup>a</sup>   | - 0.2 (1.1) <sup>y</sup>     | - 0.1 (1.1)               | - 0.3 (1.2) <sup>y</sup>  |
| Monounsaturated fat (g)           | 24 (8)                     | 21 (8)                    | 26 (8) <sup>c</sup>      | 22 (8)                     | 20 (7)                    | 23 (8) <sup>b</sup>      | - 2 (7) <sup>z</sup>         | - 1 (8) <sup>x</sup>      | - 3 (7) <sup>z</sup>      |
| Polyunsaturated fat (g)           | 13 (6)                     | 12 (6)                    | 14 (6) <sup>a</sup>      | 12 (4)                     | 11 (4)                    | 13 (5) <sup>a</sup>      | - 1 (5) <sup>z</sup>         | -1 (6)                    | - 1 (5) <sup>y</sup>      |
| Alcohol (g)                       | 14 (18)                    | 7 (11)                    | 18 (20) <sup>a</sup>     | 10 (13)                    | 7 (9)                     | 11 (14) <sup>b</sup>     | - 5 (14) <sup>z</sup>        | 0 (10)                    | - 7 (15) <sup>cz</sup>    |
| % Energy from protein             | 18.3 (3.6)                 | 19.0 (3.7)                | 18.0 (3.5) <sup>a</sup>  | 18.8 (3.5)                 | 19.0 (3.3)                | 18.7 (3.6)               | 0.5 (3.7) <sup>z</sup>       | 0.0 (3.6)                 | 0.7 (3.8) <sup>y</sup>    |
| % Energy from total carbohydrates | 43.2 (6.6)                 | 44.8 (6.4)                | 42.4 (6.6) <sup>a</sup>  | 44.1 (6.5)                 | 44.7 (6.2)                | 43.8 (6.6)               | 0.9 (6.0) <sup>z</sup>       | - 0.1 (6.2)               | 1.4 (5.9) <sup>y</sup>    |
| % Energy from total fat           | 33.5 (5.6)                 | 33.4 (5.8)                | 33.6 (5.5)               | 33.3 (5.8)                 | 33.3 (6.4)                | 33.3 (5.4)               | -0.2 (5.9)                   | - 0.1 (6.3)               | - 0.3 (5.7)               |
| % Energy from saturated fat       | 11.2 (3.1)                 | 11.4 (3.4)                | 11.2 (3.1)               | 11.0 (3.4)                 | 11.1 (3.6)                | 10.9 (3.2)               | - 0.3 (3.3)                  | - 0.3 (3.1)               | - 0.3 (3.5)               |
| % Energy from trans fat           | 1.1 (0.4)                  | 1.1 (0.43)                | 1.1 (0.5)                | 1.1 (0.5)                  | 1.1 (0.4)                 | 1.1 (0.5)                | 0.0 (0.5)                    | 0.0 (0.5)                 | 0.0 (0.5)                 |
| % Energy from monounsaturated fat | 11.7 (2.5)                 | 11.5 (2.6)                | 11.9 (2.5)               | 11.9 (2.5)                 | 11.7 (2.7)                | 12.0 (2.5)               | - 0.2 (2.8)                  | 0.2 (3.2)                 | 0.1 (2.6)                 |
| % Energy from polyunsaturated fat | 6.5 (2.2)                  | 6.7 (2.4)                 | 6.4 (2.1)                | 6.6 (1.9)                  | 6.6 (1.9)                 | 6.6 (1.9)                | 0.1 (2.4)                    | 0.0 (2.6)                 | 0.2 (2.3)                 |
| % Energy from total sugar         | 17.2 (5.7)                 | 18.7 (5.5)                | 16.5 (5.6) <sup>b</sup>  | 17.7 (5.7)                 | 18.8 (5.4)                | 17.2 (5.8) <sup>a</sup>  | 0.5 (5.0)                    | 0.2 (5.2)                 | 0.7 (4.9)                 |
| % Energy from alcohol             | 5.0 (6.1)                  | 2.9 (4.3)                 | 6.1 (6.6) <sup>c</sup>   | 3.9 (4.9)                  | 3.0 (3.9)                 | 4.3 (5.3) <sup>a</sup>   | - 1.2 (4.7) <sup>z</sup>     | 0.2 (4.0)                 | - 1.8 (5.0) <sup>cz</sup> |

a = p<0.05; b = p<0.005; c = p<0.001 women vs. men  
y = p<0.005; z = p<0.001 baseline vs. 6 months

Table 3: Associations between macronutrients and metabolic outcomes in men (n=148) and women (n=75) who provided physical activity data.

| Macronutrient                                |       | Metabolic outcomes       | Regression coefficient, $\beta$<br>(95% Confidence interval) | p<br>value |
|----------------------------------------------|-------|--------------------------|--------------------------------------------------------------|------------|
| Change to % energy from total carbohydrates  | Men   | HbA1c                    | -0.003 (-0.006, -0.001)                                      | 0.009      |
|                                              | All   | Total cholesterol        | -0.023 (-0.044, -0.002)                                      | 0.033      |
| Change to fibre (nsp) intake (g)             | Men   | Total cholesterol        | -0.025 (-0.047, -0.003)                                      | 0.023      |
|                                              | All   | LDL cholesterol          | 0.018 (0.003, 0.032)                                         | 0.016      |
| Change to % energy from total fat            | Men   | LDL cholesterol          | 0.024 (0.006, 0.042)                                         | 0.011      |
|                                              | All   | Waist circumference      | 0.014 (0.003, 0.024)                                         | 0.011      |
| Change to % energy from trans fat            | Women | Waist circumference      | 0.029 (0.006, 0.052)                                         | 0.015      |
|                                              |       | Total cholesterol        | 0.399 (0.028, 0.770)                                         | 0.036      |
|                                              |       | LDL cholesterol          | 0.365 (0.042, 0.688)                                         | 0.028      |
| Change to % energy from monounsaturated fats | All   | LDL cholesterol          | 0.036 (0.006, 0.065)                                         | 0.018      |
|                                              | All   | Diastolic blood pressure | 0.217 (0.020, 0.414)                                         | 0.031      |
| Change to % energy from alcohol              | Men   | Diastolic blood pressure | 0.276 (0.055, 0.497)                                         | 0.015      |

All models are adjusted for change in energy intake, outcome at baseline, age, BMI, time since diagnosis, medication, dietary supplements, mean daily minutes of moderate to vigorous physical activity.

For each macronutrient listed a 1% (1g for fibre) increase is associated with the change in outcome listed

# BMJ Open

## Dietary changes and associations with metabolic improvements in adults with Type 2 diabetes during a patient-centred dietary intervention: an exploratory analysis

|                                 |                                                                                                                                                                                                                                                                                                                                                                                                                                                               |
|---------------------------------|---------------------------------------------------------------------------------------------------------------------------------------------------------------------------------------------------------------------------------------------------------------------------------------------------------------------------------------------------------------------------------------------------------------------------------------------------------------|
| Journal:                        | <i>BMJ Open</i>                                                                                                                                                                                                                                                                                                                                                                                                                                               |
| Manuscript ID:                  | bmjopen-2014-004953.R1                                                                                                                                                                                                                                                                                                                                                                                                                                        |
| Article Type:                   | Research                                                                                                                                                                                                                                                                                                                                                                                                                                                      |
| Date Submitted by the Author:   | 13-May-2014                                                                                                                                                                                                                                                                                                                                                                                                                                                   |
| Complete List of Authors:       | England, Clare; University of Bristol, Centre for Exercise, Nutrition and Health Sciences<br>Thompson, Janice; The University of Birmingham, School of Sport & Exercise Sciences<br>Jago, Russ; University of Bristol, Centre for Exercise, Nutrition and Health Sciences<br>Cooper, Ashley; University of Bristol, Centre for Exercise, Nutrition and Health Sciences<br>Andrews, Robert; University of Bristol, Henry Wellcome Laboratories for Integrative |
| <b>Primary Subject Heading</b>: | Diabetes and endocrinology                                                                                                                                                                                                                                                                                                                                                                                                                                    |
| Secondary Subject Heading:      | Nutrition and metabolism                                                                                                                                                                                                                                                                                                                                                                                                                                      |
| Keywords:                       | Type 2 diabetes, Dietary analysis, Dietary change                                                                                                                                                                                                                                                                                                                                                                                                             |
|                                 |                                                                                                                                                                                                                                                                                                                                                                                                                                                               |

SCHOLARONE™  
Manuscripts

1  
2  
3 **Dietary changes and associations with metabolic improvements in**  
4 **adults with Type 2 diabetes during a patient-centred dietary**  
5 **intervention: an exploratory analysis**  
6  
7  
8  
9

10 Corresponding author: Clare England. Tel, +44 (0)117 331 1096. Fax +44(0)117 954 6756. e-  
11 mail: clare.england@bristol.ac.uk.  
12

13  
14 Authors: C. Y., England<sup>1</sup>, J. L., Thompson<sup>3</sup>, R., Jago<sup>1</sup>, A. R., Cooper<sup>1</sup>, R. C. Andrews<sup>2</sup>  
15  
16

17 The study was carried out at The University of Bristol, Senate House, Tyndall Avenue,  
18 Bristol BS8 1TH  
19

20  
21 1. Centre for Exercise Nutrition and Health Sciences, School for Policy Studies, 8 Priory  
22 Road, University of Bristol, BS8 1TZ  
23

24  
25 2. School of Clinical Sciences, University of Bristol, Learning and Research, Southmead  
26 Hospital  
27

28  
29 Bristol BS10 5NB  
30

31  
32 3. University of Birmingham, School of Sport, Exercise & Rehabilitation Sciences,  
33 Edgbaston, Birmingham, B15 2TT  
34

35  
36 Running title: Dietary change in adults with Type 2 diabetes  
37

38 *Keywords: Type 2 diabetes, dietary analysis, dietary change*  
39  
40  
41  
42

43 Bath Research Ethics Committee (05/Q2001/5)  
44

45  
46 Word count  
47

48 Abstract: 299  
49

50 Main text: 3758  
51

52  
53 Number of tables: 3  
54  
55  
56  
57  
58  
59  
60

1  
2  
3 1 Abstract  
4

5 2 *Objectives:* Describe dietary intake of participants enrolled in a non-prescriptive dietary  
6  
7 3 intervention and dietary changes at 6 months and explore whether these changes had a role in  
8  
9 4 observed improvements in HbA1c, weight, lipids and blood pressure.

10  
11 5 *Design:* Secondary analysis of data from the Early ACTivity in Diabetes randomised  
12  
13 6 controlled trial.

14  
15 7 *Participants* 262 patients with newly diagnosed Type 2 diabetes randomised to the dietary  
16  
17 8 intervention.

18  
19 9 *Outcomes and analysis:* Changes in energy intake, macronutrients, fibre and alcohol and in  
20  
21 10 weight, waist circumference, lipids, HbA1c and blood pressure at baseline and 6 months.  
22  
23 11 Multivariate models were used to examine associations between dietary changes and  
24  
25 12 metabolic variables.

26  
27 13 *Results:* Men reported reducing mean energy intake from  $1903 \pm 462$ kcal to  $1685$ kcal  $\pm$   
28  
29 14  $439$ kcal ( $p < 0.001$ ), increasing carbohydrate intake from  $42.4 \pm 6.6\%$  to  $43.8 \pm 6.6\%$   
30  
31 15 ( $p = 0.002$ ) and reducing median alcohol intake from 13 (0-27)g to 5 (0-18)g ( $p < 0.001$ ).  
32  
33 16 Women reported reducing mean energy intake from  $1582 \pm 379$ kcal to  $1459 \pm 326$ kcal  
34  
35 17 ( $p < 0.001$ ) with no change to macronutrient distribution and alcohol. Fibre intake was  
36  
37 18 maintained. In men ( $n = 148$ ) weak and clinically insignificant associations were found  
38  
39 19 between increased carbohydrates and reduction in HbA1c ( $\beta = -0.003$  [-0.006, -0.001];  
40  
41 20  $p = 0.009$ ), increased fibre and reduction in total cholesterol ( $\beta = -0.023$  [-0.044, -0.002];  
42  
43 21  $p = 0.033$ ), decreased total fat and reduction in LDL-cholesterol ( $\beta = 0.024$  [0.006, 0.001];  
44  
45 22  $p = 0.011$ ), and decreased alcohol and reduction in diastolic blood pressure ( $\beta = 0.276$  [0.055,  
46  
47 23  $0.497$ ];  $p = 0.015$ ). In women ( $n = 75$ ) associations were found between a decrease in trans-fats  
48  
49 24 and reductions in waist circumference ( $\beta = -0.029$  [0.006, 0.052];  $p = 0.015$ ), total cholesterol  
50  
51 25 ( $\beta = 0.399$  [0.028, 0.770];  $p = 0.036$ ) and LDL cholesterol ( $\beta = 0.365$  [0.042, 0.668];  $p = 0.028$ ).

52  
53 26 *Conclusion:* Clinically important metabolic improvements observed in a patient-centred  
54  
55 27 dietary intervention were not explained by changes in macronutrients. However, a non-  
56  
57 28 prescriptive approach may promote a reduction in total energy intake whilst maintaining fibre  
58  
59 29 consumption.  
60



30 Article summary31 Strengths and limitations

- 32 • Describes the dietary intake of people soon after diagnosis of Type 2 DM living in the  
33 UK, the dietary changes made during a dietary intervention and explores associations  
34 between dietary changes and changes in metabolic outcomes. This intervention was  
35 based on the dietary advice that is given in routine clinical practice in the UK.  
36
- 37 • Only 53% of the participants provided food diary data at the end of the trial and these  
38 people showed greater improvements in metabolic outcomes than those who did not  
39 return food diaries. It is probable that they were more motivated than a typical patient  
40 group and this limits the generalizability of the findings.

## 41 Introduction

42 Dietary management is recognised as highly important in the treatment of Type 2 diabetes  
43 (Type 2 DM). Based upon meta-analyses of exercise and diet studies, the American Diabetes  
44 Association (ADA) and European Association for the Study of Diabetes (EASD) recommend  
45 that lifestyle interventions should be initiated as the first step in treating new-onset Type 2  
46 DM [1]. Over the last 3 years, The Look Ahead research group, the Lifestyle Over and Above  
47 Drugs in Diabetes (LOADD) and Early Activity in Diabetes (Early ACTID) randomised  
48 controlled trials (RCTs) have shown that dietary interventions which target weight reduction  
49 are beneficial and improve glycaemic control [2-4]. These trials achieved reductions in  
50 HbA1c comparable to reductions demonstrated in patients starting metformin or a gliptin as  
51 monotherapies [5] and, although the Look Ahead trial showed no reduction in cardiovascular  
52 events after 9.6 years, participants in the intervention arm were less likely to be treated with  
53 insulin [6].

54  
55 It has been reported that changes to the macronutrient composition of the diet may impact  
56 upon glycaemic control, blood lipids and weight [7], but the effect of specific dietary changes  
57 on these metabolic outcomes are still unclear and no single ‘diet for diabetes’ has been  
58 identified [8]. In recognition of this, both the 2012 ADA and EASD joint guidelines and 2011  
59 Diabetes UK nutritional guidelines emphasise the importance of an individualised, patient-  
60 centred approach to diet rather than a prescriptive approach [1,9]. This approach recognises  
61 that different people have individual dietary habits and may find certain dietary changes more  
62 straightforward than others. There is evidence that men and women living in the UK have  
63 differing dietary patterns [10]. Men have been reported to drink more alcohol and consume  
64 more meat but less fruit and diet soft drinks than women [11] Few studies have looked at what  
65 changes are made to macronutrients in response to non-prescriptive dietary advice, whether  
66 men and women make different changes and whether these changes impact on metabolic  
67 control.

68  
69 The Early ACTID trial included a non-prescriptive, patient-centred dietary intervention. The  
70 trial aimed to assess whether adding physical activity to a dietary intervention produced  
71 greater benefit than diet alone or usual care in individuals newly diagnosed with Type 2 DM  
72 [4]. Participants who received the lifestyle interventions had better HbA1c, lower body

1  
2  
3 73 weight, less insulin resistance, and were on less medication than the control group at 6 and 12  
4 74 months. During the intervention participants in this cohort reported small changes to higher  
5 75 calorie, low fibre foods. Examination of the specific changes to foods and food groups  
6 76 reported by participants has been previously published [12] and this current paper focuses on  
7 77 macronutrients.  
8  
9  
10  
11

12 78  
13  
14 79 The aim of this paper is to describe baseline energy and macronutrient intakes of men and  
15 80 women who were enrolled into the dietary intervention in the Early ACTID study and to  
16 81 examine reported dietary changes made after 6 months.  
17  
18  
19

20 82 We conducted exploratory analysis to examine the following hypotheses:  
21

- 22  
23 83 • Men and women with Type 2 DM make different dietary changes in response to a  
24 84 dietary intervention.  
25  
26 85 • The changes to energy intake and macronutrients are associated with beneficial  
27 86 changes to glycaemic control, weight, waist circumference, blood pressure and lipids.  
28  
29

## 30 87 Subjects and methods

### 31 88 *Subjects*

32  
33  
34  
35 89 This paper is an exploratory analysis of data from the Early ACTID randomised controlled  
36 90 trial. Early ACTID was a diet and physical activity trial involving patients living in the South  
37 91 West of England who were recruited within 5 to 8 months of a diagnosis of Type 2 DM from  
38 92 December 2005 to September 2008. Full trial procedures with the CONSORT diagram and  
39 93 results are described elsewhere [4 ,13 ,14]. The analysis is limited to participants in the  
40 94 intervention arms who returned valid food diary data.  
41  
42  
43  
44

### 45 95 *Overview of the dietary intervention*

46  
47  
48 96 Patients in the diet alone and the diet and physical activity groups received the same dietary  
49 97 intervention. For the first 6 months the intervention aimed to promote dietary change. At  
50 98 randomisation patients attended a one-hour appointment with a study dietitian followed by 2  
51 99 further visits of 30 minutes. These visits were supported by 6 additional visits with a research  
52 100 nurse, where 15 minutes were used to discuss dietary matters for both groups, reinforcing  
53  
54  
55  
56  
57  
58  
59  
60

1  
2  
3 101 dietary goals, and 15 minutes to discuss either physical activity or other matters pertinent to  
4 102 the patient, depending upon intervention group allocated to. Maintenance was the primary  
5 103 goal of the second 6 months and consisted of 2 more 30 minute dietitian visits and 4  
6 104 additional visits with the research nurses.  
7  
8  
9

10 105 The dietary intervention was based upon the 2003 Diabetes UK healthy eating guidelines [15]  
11 106 and employed goal oriented motivational interviewing [16]. Patients were encouraged to  
12 107 discuss their reasons for change, any ambivalence about change and to set their own dietary  
13 108 goals and identify their own strategies for achieving these goals. Prescriptive daily  
14 109 requirements for energy or macronutrients were not calculated unless requested by the patient  
15 110 and prescriptive meal plans or food lists were not used. Instead patients received study  
16 111 specific written dietary information at each visit (available here:  
17 112 <http://jcrubristol.org.uk/EA/ACTID%20patients%20Handbook/Forms/AllItems.aspx>) and  
18 113 were encouraged to use this to evaluate their own eating habits. The materials included  
19 114 information on maintaining a regular meal pattern and including starchy carbohydrates as a  
20 115 part of each meal, reducing total, saturated and *trans* fat intake, limiting non-milk extrinsic  
21 116 sugars, aiming for 5 portions a day of fruit and vegetables and gave guidance on portion  
22 117 control. Specific food choices were discussed and participants were advised on choosing  
23 118 wholegrain and higher fibre foods, reducing fatty and processed meats and high fat dairy  
24 119 products, and increasing oily fish and limiting foods like cakes, biscuits, salty snacks and  
25 120 take-away meals. The benefit of aiming for a 5 to 10% weight loss by reducing overall  
26 121 energy intake was discussed with everyone. Goals were reviewed at each appointment and  
27 122 successes, difficulties and new strategies discussed. Patients were encouraged to self-monitor  
28 123 their weight and diet.  
29  
30  
31  
32  
33  
34  
35  
36  
37  
38  
39  
40  
41  
42

#### 43 *Measurements*

44  
45 125 Measures were taken at baseline (prior to randomisation) and repeated 6 and 12 months later.  
46 126 Baseline and 6 month data were used in the current analysis, since outcomes at 6 months  
47 127 were defined as the primary endpoint of the study. Measurements used in this analysis were  
48 128 weight, height (to calculate body mass index (BMI)), waist circumference, blood pressure,  
49 129 HbA1c, fasting lipids and minutes of moderate to vigorous physical activity (MVPA)  
50 130 measured using accelerometry and defined as activity expending greater than 3kcal/kg/hour .  
51  
52 131 As previously described, blood measurements and anthropometric measures were carried out  
53  
54  
55  
56  
57  
58  
59  
60

1  
2  
3 132 using standardised procedures [13]. Smoking habits and use of dietary supplements were  
4 133 assessed by a research nurse. The UK Index of Multiple Deprivation (IMD) 2007 was  
5  
6 134 calculated from home postcode and used as an indicator of socio-economic position [17].  
7

8  
9 135 *Dietary assessment and analysis*

10  
11 136 Patients in the intervention arms were asked to complete 4-day food diaries, to include 2  
12 137 weekdays and 1 weekend day, prior to each dietitian appointment, recording all foods and  
13 138 drinks consumed during those 4 days. Portion sizes were estimated using household measures  
14 139 and package weights and brands indicated where appropriate. The diaries were discussed  
15 140 during the appointments and used to identify potential areas for change, difficulties in making  
16 141 change, and for patients to observe change in their diets over time. Patients were asked to  
17 142 return all the diaries at the final visit for further analysis. Those who did not return diaries at  
18 143 the visit were reminded by telephone and e-mail to post outstanding diaries to the research  
19 144 team after the visit.  
20

21 145 Baseline and 6-month food diaries were coded by one coder and checked for accuracy and  
22 146 agreement by a second coder, using the dietary coding programme Diet in Data Out (DIDO),  
23 147 developed at the Medical Research Council Human Nutrition Unit in Cambridge, UK [18].  
24 148 Diaries were analysed with the nutrient analysis programme Bristol General Analysis of  
25 149 Dietary Experiments (BRIGADE) [19]. The nutrient database is based on *McCance and*  
26 150 *Widdowson's Composition of Foods, 5<sup>th</sup> edition* [20], updated with the supplements to that  
27 151 edition, new data from the 6<sup>th</sup> edition and manufacturers' data. Additional nutrient data from  
28 152 the INTERMAP nutrient database for the UK were also used [21]. If no portion size  
29 153 information was given, age-appropriate portion sizes were assigned [22]. The mean daily  
30 154 consumption of each nutrient was calculated for each participant.  
31

32 155 *Statistical analysis*

33 156 As the dietary intervention was designed to be identical for both intervention groups and  
34 157 there were no difference in outcomes between the diet and diet and physical activity groups,  
35 158 the data were analysed as a cohort. Patients in the usual care group were excluded from the  
36 159 analysis since they did not receive the dietary intervention and were not asked to complete a  
37 160 diary at 6 months. Descriptive statistics were used for patient characteristics and for intakes  
38 161 of macronutrients at baseline and 6 months. Variables were checked for normal distribution;  
39  
40  
41  
42  
43  
44

1  
2  
3 162 non-normal variables were log transformed prior to analysis. For ease of interpretation,  
4 163 arithmetic means and back transformed variables are presented. Independent *t*-tests were used  
5 164 to explore differences in continuous variables between men and women at baseline and  
6 165 between those who did and did not return food diaries, and chi-squared tests were used to  
7 166 explore differences in dichotomous variables. Paired sample *t*-tests were used to describe  
8 167 differences in energy and macronutrient intake between baseline and 6 months. McNemar  
9 168 tests were used to explore differences in numbers of people meeting recommendations at  
10 169 baseline and 6 months. As alcohol variables could not be transformed, the Mann Whitney U  
11 170 and paired sample Wilcoxon signed rank test were used to describe differences. Cases with  
12 171 missing data were excluded listwise. Data were assumed to be randomly missing and table 1  
13 172 includes numerical superscripts to indicate the number of participants with missing data for  
14 173 the variable of interest.

15  
16  
17  
18  
19  
20  
21  
22  
23  
24 174 Multivariate regression models were used to conduct exploratory analysis to investigate  
25 175 associations between changes in energy and macronutrient intake and the metabolic variables  
26 176 at 6 months in those who provided valid physical activity data. Changes in energy intake  
27 177 were explored using a standard multivariate model. Each macronutrient was explored  
28 178 independently using a multivariate nutrient density model to adjust for change in energy  
29 179 intake. Change in percentage energy from each macronutrient was calculated and entered into  
30 180 the model with change in total energy included as a covariate. Change in fibre intake was  
31 181 explored using a standard multivariate model and entered as an absolute intake (in grams)  
32 182 with change to total energy intake as a covariate [23]. Models were adjusted for age, BMI,  
33 183 time since diagnosis, minutes of moderate to vigorous physical activity (MVPA) and  
34 184 dichotomous yes/no variables for smoking status, relevant lipid lowering, blood pressure and  
35 185 diabetes medication and dietary supplement use at 6 months.

36  
37  
38  
39  
40  
41  
42  
43  
44  
45 186 Due to the number of different analyses that were conducted the results are interpreted in  
46 187 terms of strength of evidence of associations [24]. This is an exploratory analysis and as such  
47 188 has not been adjusted for multiple comparisons [25 ,26], consequently p values of <0.05 are  
48 189 interpreted as some evidence of association, p<0.01 as increasing evidence and p<0.001 as  
49 190 strong evidence.

## 50 191 Results

### 51 192 *Study participants*

1  
2  
3 193 A total of 593 patients were recruited into the Early ACTID study, with 494 being assigned to  
4 194 one of the intervention groups. 396 (80%) patients were recorded as completing food diaries  
5 195 at both baseline and 6 months but only 262 (53%) patients returned them. Metabolic and  
6 196 dietary outcomes at baseline and 6 months are presented for these 262 patients. At 6 months  
7 197 491 (99%) patients assigned to one of the intervention arms remained in the study, with 434  
8 198 (88%) attending all scheduled visits up to that point and a further 37 (8%) attending all except  
9 199 one.

10  
11  
12  
13  
14  
15 200 Mean age was 62.4 (9.0) years, 97% of patients were white, 83% were married or with a long  
16 201 term partner and 41% were in the lowest IMD quartile. At baseline 104 (40%) of participants  
17 202 were on oral hypoglycaemic medication, 170 (65%) on lipid lowering medication and 174  
18 203 (66%) on blood pressure medication. Only 6% of patients were current smokers at baseline.  
19 204 Men and women had similar characteristics, although there was some evidence that men were  
20 205 more likely to be on lipid lowering medication than women (69% vs. 56%,  $p=0.041$ ). At 6  
21 206 months, 105 (40%) of participants were on oral hypoglycaemic medication, although 12 (5%)  
22 207 participants had increased the dose and 4 (2%) had decreased; 177 (68%) were on lipid  
23 208 lowering medication and 175 (67%) were on blood pressure medication.

24  
25  
26  
27  
28  
29  
30  
31 209 Compared to the patients who did not return food diaries, those who did were older (62 years  
32 210 vs 57 years,  $p<0.001$ ), with a lower mean weight (88.2 kg vs 93.3 kg,  $p=0.001$ ), lower mean  
33 211 BMI (30.7 vs 32.5,  $p=0.001$ ) and lower mean waist circumference (105 cm vs 108 cm,  
34 212  $p=0.025$ ), but there was no difference in glycaemic control, lipids and blood pressure.

### 35 213 *Metabolic outcomes*

36  
37  
38  
39  
40  
41  
42 214 Table 1 shows the metabolic outcomes at baseline and 6 months for those who returned food  
43 215 diaries. There was no difference in glycaemic control or blood pressure between men and  
44 216 women, but women had higher total ( $p<0.001$ ), LDL ( $p<0.001$ ) and HDL ( $p=0.015$ )  
45 217 cholesterol levels.

46  
47  
48  
49 218 Weight, waist circumference and BMI improved at 6 months for both men and women  
50 219 ( $p<0.001$ ). Men and women improved their HbA1c (men:  $p=0.006$ ; women:  $p<0.001$ ). Men  
51 220 improved their fasting blood glucose ( $p=0.006$ ) and there is some evidence that women  
52 221 increased their HDL cholesterol ( $p=0.033$ ).



222 At 6 months those who returned food diaries had lost more weight (2.4 kg vs 1.3 kg,  
223  $p=0.001$ ), reduced waist circumference more (2.7 cm vs 1.3 cm,  $p=0.022$ ) and reduced  
224 HbA1c (0.18% (2 mmol/l) vs 0% (0 mmol/l),  $p=0.02$ ).

### 225 *Nutrient analysis*

226 Table 2 shows the mean reported energy and nutrient intakes at baseline and 6 months and  
227 their mean reported changes.

228 At baseline participants reported generally good dietary habits. 61% of women and 59% of  
229 men reported the recommended total fat intake (less than 35% of energy from total fat) and  
230 55% of women and 66% of men reported a low to moderate carbohydrate intake (<45% of  
231 energy). Men were more likely to drink alcohol and more likely to drink to excess than  
232 women with 49% of women and 28% of men recording no alcohol during the 4 days and 8%  
233 of women and 19% of men reporting more than 30g of alcohol per day ( $p=0.022$ ).

234 At 6 months mean daily reported energy intake was reduced by 187 kcal ( $p<0.001$ ). Men  
235 reduced their energy intake more than women ( $218 \pm 332$  vs.  $123 \pm 270$  kcal/day,  $p=0.022$ ).  
236 This was achieved by small reductions in all macronutrients, whilst maintaining fibre intake.  
237 The mean percentage energy from macronutrients was unchanged for women whilst men  
238 reported a small mean increase of  $1.4 \pm 5.9\%$  ( $p<0.001$ ) of energy from carbohydrates. Men  
239 reported reducing median alcohol intake ( $p<0.001$ ), with 40% reporting no alcohol during the  
240 4 days and 15% reporting more than 30g per day. There was no reported median change in  
241 alcohol intake for women. Despite no mean change to energy from saturated fat, more men  
242 met recommendations at 6 months (35% men at baseline vs. 49% at 6 months reporting less  
243 than 10% energy from saturated fat,  $p=0.007$ ). There was no change in the number of women  
244 meeting recommendations (40% baseline vs 44% at 6 months,  $p=0.71$ ).

245 Valid physical activity data and dietary data were provided by 223 (45%) participants. Table  
246 3 shows the regression coefficients and confidence intervals for changes in energy and  
247 macronutrients that show evidence for associations with specific metabolic variables. In men  
248 a 1% reduction in energy from alcohol was associated with a 0.276 mmHg reduction in  
249 diastolic blood pressure (95% CI= 0.055 to 0.497). In women a 1% reduction in energy from  
250 trans-fat was associated with a decrease in cholesterol of 0.399 mmol/l (95% CI= 0.028 to  
251 0.770). In men a 1% increase in energy from carbohydrate was associated with a decrease in



1  
2  
3 252 HbA1c of 0.003% (95% CI= -0.006 to -0.001). There were no associations between change  
4 253 in energy intake and the metabolic variables.  
5  
6

7 254  
8

9  
10 255 Discussion

11  
12 256 *Main findings*

13  
14 257 The main findings from this exploratory analysis are that patients who were randomised to  
15 258 the intervention arms in the Early ACTID study and returned food diaries reported a good  
16 259 diet at baseline but still achieved small dietary changes. They reported a mean decrease in  
17 260 energy intake of around 200 kcal per day, during the first 6 months. This is a modest  
18 261 reduction in calorie intake but, if sustained, will have an impact on weight and glycaemic  
19 262 control. It has been argued that long-term small changes are more effective for weight  
20 263 management than short-term large changes [27]. Men reported a reduced alcohol intake that  
21 264 produced a greater reduction in energy and reported a small increase in the percentage energy  
22 265 from carbohydrate. Women reported modest reductions to all macronutrients but made no  
23 266 changes to alcohol, their energy reduction was less and the macronutrient ratio of their diets  
24 267 did not change. Both sexes maintained fibre intake. Although changes in percentage intake of  
25 268 macronutrients were associated with metabolic outcomes, these effect sizes were too small to  
26 269 be of clinical significance  
27  
28

29  
30  
31  
32  
33  
34  
35  
36  
37 270 *Comparison with other studies*

38  
39 271 The Early ACTID dietary intervention was a pragmatic, 'real world' intervention, in which  
40 272 participants discussed dietary advice with dietitians and nurses to decide on their own dietary  
41 273 changes. The approach contrasts with dietary studies where participants are asked to make  
42 274 specific, prescribed changes to the macronutrient composition, by lowering carbohydrate and  
43 275 increasing protein [28-30] or to lower the glycaemic index [31 ,32]. The LOADD trial [3]  
44 276 based a successful dietary intervention in patients with poor glycaemic control on very  
45 277 similar recommendations to those used in the Early ACTID intervention, but total energy  
46 278 intake and macronutrient ratios for each participant were calculated and diets were prescribed  
47 279 according to these calculations taking into account personal preference, budget and  
48 280 sociocultural factors. The Early ACTID intervention did not compare a prescriptive with a  
49 281 non-prescriptive approach so cannot be used to demonstrate that this is superior but  
50  
51  
52  
53  
54  
55  
56  
57  
58  
59  
60

1  
2  
3 282 reductions in weight, waist circumference and HbA1c were achieved that are comparable to  
4 283 those achieved during these interventions. Withdrawal rates for prescriptive dietary  
5 284 interventions range from 10% to 30% and these higher withdrawal rates may suggest that in  
6 285 routine clinical care a more flexible approach can be advantageous in promoting retention. Of  
7 286 those participants in Early ACTID who either did not attend all appointments or withdrew  
8 287 completely, only one person stated that they did not see the benefit of the trial. The majority  
9 288 could not schedule all 9 dietitian and nurse visits because of other commitments, 5 cited other  
10 289 health issues, 3 moved too far away, 1 said they 'did not want to diet,' 1 wanted to take  
11 290 orlistat from baseline and 3 gave no reasons. What is common to intervention trials in  
12 291 diabetes is that patients receive individual support and attend multiple appointments with a  
13 292 dietitian or a health practitioner who is expert in promoting dietary change. It is important to  
14 293 emphasise that this model is not routinely replicated in primary care for patients with Type 2  
15 294 DM.

16 295 Exploratory analysis of the associations between specific dietary changes and metabolic  
17 296 outcomes found small effect sizes that are not clinically important, but they are consistent  
18 297 with existing nutritional data on the benefits of a reduction in trans fats on lipids and waist  
19 298 circumference [33], an increase in fibre on LDL cholesterol [34] and a reduction in alcohol  
20 299 and blood pressure [35]. It is of interest that this analysis found that there was no benefit in  
21 300 carbohydrate reduction in men with good glycaemic control who are already consuming a  
22 301 low to moderate carbohydrate diet. It is not possible to determine whether there is an  
23 302 optimum macronutrient distribution for T2 DM from this analysis, particularly in those with  
24 303 poor glycaemic control, but there is no unequivocal evidence that low carbohydrate diets  
25 304 produce better blood glucose control or weight loss than higher carbohydrate diets [36]. A  
26 305 meta-analysis of low carbohydrate diets versus low fat diets conducted in 2012 [37]  
27 306 concluded that there was evidence of a small but beneficial effect on lipid profiles of a low  
28 307 (defined as <45% energy from carbohydrate) or very low carbohydrate (<60g carbohydrate)  
29 308 diet but no difference in improvements to weight or glycaemic control. Larsen et al [29]  
30 309 correlated dietary change with metabolic outcomes and found associations with energy  
31 310 reduction and HbA1c and waist circumference.

32  
33  
34  
35  
36  
37  
38  
39  
40  
41  
42  
43  
44  
45  
46  
47  
48  
49  
50  
51 311 *Strengths and weaknesses*  
52  
53  
54  
55  
56  
57  
58  
59  
60

1  
2  
3 312 To our knowledge this is the first study to describe the dietary intake of people soon after  
4 313 diagnosis with Type 2 DM living in the UK, the dietary changes made during an intervention  
5 314 based on patient-centred, non-prescriptive dietary advice and that examines associations  
6 315 between dietary change and metabolic variables. The demographics of the Early ACTID  
7 316 participants included in this analysis suggest that these findings are only representative of the  
8 317 white population; however the sample is socio-economically diverse with 40% of participants  
9 318 living in areas of high economic deprivation. Ethical approval was granted to make no  
10 319 changes to hypoglycaemic, lipid lowering or blood pressure medications during the first 6  
11 320 months, unless absolutely necessary and this was controlled by a strict protocol. Due to small  
12 321 numbers those participants who made medication changes were included in the analysis  
13 322 without correction.

14  
15  
16 323 The study has important weaknesses. Only 53% of the participants returned baseline and 6  
17 324 month food diaries at the end of the trial and these people had a lower BMI and waist  
18 325 circumference at baseline and achieved greater metabolic improvements. The participants  
19 326 who did not return diaries reported mislaying them which may indicate less motivation and  
20 327 less engagement with the trial. Participants who did return diaries could have been more  
21 328 motivated to make dietary changes than a typical patient population, and, given that their  
22 329 diets were good at baseline, may already have made dietary changes prior to entry into the  
23 330 Early ACTID study. The relative lack of dietary data limits our ability to generalise these  
24 331 findings to broader patient groups. Furthermore this was an exploratory analysis using an  
25 332 existing dataset and as such an estimation of sample size was not conducted in advance. .  
26 333 However, post hoc sample calculations indicate that the study was underpowered to detect small  
27 334 associations between dietary changes and metabolic outcomes, having 15% power for women and  
28 335 52% for men at an alpha of 0.05.

29  
30  
31  
32  
33  
34  
35  
36  
37  
38  
39  
40  
41  
42  
43  
44 336

45  
46 337 The use of any self-reported measure of diet, including 4-day food diaries, is a recognised  
47 338 limitation in dietary studies. Under-reporting of food intake and selective under-reporting or  
48 339 under-eating of foods perceived to be 'bad' are commonly documented, especially in people  
49 340 who are obese [38 ,39]. Measurement of alcohol can be problematic due to the episodic  
50 341 nature of consumption, although including at least one weekend day can improve estimates  
51 342 by including alcohol consumption of 'weekend-only' drinkers [40]. Methods exist to estimate  
52 343 under-reporting, using calculated basal metabolic rate and estimates of physical activity [41

1  
2  
3 344 ,42] but these methods assume that an individual's weight is stable and are consequently  
4 345 inappropriate for use during a weight loss trial. It should be noted that other dietary  
5 346 interventions in patients with Type 2 DM have reported similar energy intakes [28 ,31] and  
6 347 an energy reduction of around 200kcal/day is plausible assuming a dynamic model of energy  
7 348 balance [43] and given the modest weight reduction observed. It is also important to note that  
8 349 this is a secondary analysis so cause and effect cannot be assumed. It was not possible to  
9 350 perform a formal mediation analysis since participants from the control arm were not asked to  
10 351 complete a food diary at 6 months.

11  
12  
13  
14  
15  
16  
17 352 *Conclusion*

18  
19 353 The Early ACTID trial indicates that a flexible, non-prescriptive approach to dietary advice  
20 354 based on standard healthy eating guidelines in Type 2 DM given soon after diagnosis may be  
21 355 effective in promoting small dietary change, even in patients with good glycaemic control.  
22 356 This supports current clinical practice and guidelines. The current analysis suggests that  
23 357 changes in percentage intake of macronutrients did not have any clinically significant effect  
24 358 on metabolic outcomes during the trial but this needs confirmation in a larger cohort, with  
25 359 less good glycaemic control. Further research is needed on whether dietary changes made  
26 360 using a non-prescriptive approach are sustainable and beneficial in the longer term in a more  
27 361 typical patient population.  
28  
29  
30  
31  
32  
33  
34  
35  
36  
37  
38  
39  
40  
41  
42  
43  
44  
45  
46  
47  
48  
49  
50  
51  
52  
53  
54  
55  
56  
57  
58  
59  
60

### Acknowledgements

We would like to acknowledge the participants in the Early ACTID trial, members of the Early ACTID team and steering committee, Dr Pauline Emmett for advice on dietary analysis, Dr Rosemary Greenwood for advice on statistical analysis and Professor Debbie Sharp for assistance in manuscript preparation.

### Funding

The Early ACTID trial was supported by Diabetes UK, the UK Department of Health and Western Comprehensive Local Research Network. Pilot dietary analysis was supported by the Above and Beyond Foundation. C.Y. England is supported by NIHR Clinical Doctoral Research Fellowship 10-017.

### Authors' contributions

This work forms part of the PhD of CYE which is supervised by RCA, JLT and RJ. RCA led the Early ACTID study and advised on clinical application of this work. CYE participated in data collection, data entry and was responsible for data analysis with guidance from JLT and RJ. ARC was responsible for the design of the ACTID physical activity intervention and for processing and analysis of the physical activity data. The first draft of the manuscript was prepared by CYE with critical input and revisions by all other authors. All authors approved the final manuscript.

### Conflicts of interests

The authors declare that they have no conflict of interest

### Data Sharing Statement

No additional data are available

## References

1. Inzucchi S, Bergenstal R, Buse J, et al. Management of hyperglycaemia in type 2 diabetes: a patient-centered approach. Position statement of the American Diabetes Association (ADA) and the European Association for the Study of Diabetes (EASD). *Diabetologia* 2012;**55**(6):1577-96 doi: 10.1007/s00125-012-2534-0[published Online First: Epub Date].
2. Wing RR, Lang W, Wadden TA, et al. Benefits of Modest Weight Loss in Improving Cardiovascular Risk Factors in Overweight and Obese Individuals With Type 2 Diabetes. *Diabetes Care* 2011;**34**(7):1481-86 doi: 10.2337/dc10-2415[published Online First: Epub Date].
3. Coppel KJ, Kataoka M, Williams SM, et al. Nutritional intervention in patients with type 2 diabetes who are hyperglycaemic despite optimised drug treatment - Lifestyle Over and Above Drugs in Diabetes (LOADD) study: randomised controlled trial. *BMJ* 2010;**341** doi: 10.1136/bmj.c3337[published Online First: Epub Date].
4. Andrews RC, Cooper AR, Montgomery AA, et al. Diet or diet plus physical activity versus usual care in patients with newly diagnosed type 2 diabetes: the Early ACTID randomised controlled trial. *Lancet* 2011;**378**(9786):129-39
5. Aschner P, Katzeff HL, Guo H, et al. Efficacy and safety of monotherapy of sitagliptin compared with metformin in patients with type 2 diabetes. *Diabetes Obes. Metab.* 2010;**12**(3):252-61 doi: 10.1111/j.1463-1326.2009.01187.x[published Online First: Epub Date].
6. The Look AHEAD Research Group. Cardiovascular Effects of Intensive Lifestyle Intervention in Type 2 Diabetes. *N. Engl. J. Med.* 2013;**369**(2):145-54 doi: doi:10.1056/NEJMoa1212914[published Online First: Epub Date].
7. Ajala O, English P, Pinkney J. Systematic review and meta-analysis of different dietary approaches to the management of type 2 diabetes. *Am. J. Clin. Nutr.* 2013;**97**(3):505-16
8. Franz MJ, Powers MA, Leontos C, et al. The Evidence for Medical Nutrition Therapy for Type 1 and Type 2 Diabetes in Adults. *J. Am. Diet. Assoc.* 2010;**110**(12):1852-89 doi: 10.1016/j.jada.2010.09.014[published Online First: Epub Date].
9. Dyson PA, Kelly T, Deakin T, et al. Diabetes UK evidence-based nutrition guidelines for the prevention and management of diabetes. *Diabetic. Med.* 2011;**28**(11):1282-88 doi: 10.1111/j.1464-5491.2011.03371.x[published Online First: Epub Date].
10. Northstone K, Emmett PM. Dietary patterns of men in ALSPAC: associations with socio-demographic and lifestyle characteristics, nutrient intake and comparison with women's dietary patterns. *Eur. J. Clin. Nutr.* 2010;**64**(9):978-86
11. Hoare J, Henderson L, Bates CJ. National Diet and Nutrition Survey: adults aged 19 to 64 years. Volume 5: Summary report., 2004.
12. England CY, Andrews R, Jago R, et al. Changes in reported food intake in adults with type 2 diabetes in response to a nonprescriptive dietary intervention. *J. Hum. Nutr. Diet.* 2013:n/a-n/a doi: 10.1111/jhn.12154[published Online First: Epub Date].
13. Cooper A, Sebire S, Montgomery A, et al. Sedentary time, breaks in sedentary time and metabolic variables in people with newly diagnosed type 2 diabetes. *Diabetologia* 2012;**55**(3):589-99 doi: 10.1007/s00125-011-2408-x[published Online First: Epub Date].
14. Malpass A, Andrews R, Turner KM. Patients with Type 2 Diabetes experiences of making multiple lifestyle changes: A qualitative study. *Patient Educ. Couns.* 2009;**74**(2):258-63 doi: 10.1016/j.pec.2008.08.018[published Online First: Epub Date].
15. Connor H, Annan F, Bunn E, et al. The implementation of nutritional advice for people with diabetes. *Diabetic. Med.* 2003;**20**(10):786-807
16. Miller WR. Motivational interviewing: research, practice, and puzzles. *Addict. Behav.* 1996;**21**(6):835-42 doi: 0306460396000445 [pii][published Online First: Epub Date].



17. Social Disadvantage Research Centre. The English Indices of Deprivation 2004. In: Research DoSPaS, ed. Oxford: Communities and Local Government, 2004:14 - 42.
18. Price GM, Paul AA, Key FB, et al. Measurement of diet in a large national survey: comparison of computerized and manual coding of records in household measures. *J. Hum. Nutr. Diet.* 1995;**8**(6):417-28 doi: 10.1111/j.1365-277X.1995.tb00337.x[published Online First: Epub Date]].
19. Cowin I, Emmett P, the ALSPAC study team. Diet in a group of 18-month-old children in South West England, and comparison with the results of a national survey. *J. Hum. Nutr. Diet.* 2000;**13**(2):87-100 doi: 10.1046/j.1365-277x.2000.00220.x[published Online First: Epub Date]].
20. Holland B, Welch AA, Unwin ID, et al. *McCance and Widdowson's The Composition of Foods*. 5th Edition ed. Cambridge: Royal Society of Chemistry, 1991.
21. Dennis B, Stamler J, Buzzard M, et al. INTERMAP: the dietary data--process and quality control. *J. Hum. Hypertens.* 2003;**17**(9):609-22
22. Wreiden WL, Barton KL. Calculation and Collation of Typical Food Portion Sizes for Adults Aged 19-64 and Older People Aged 65 and Over. Final Technical Report to the Food Standards Agency. Available from [http://www.foodbase.org.uk/results.php?f\\_report\\_id=82](http://www.foodbase.org.uk/results.php?f_report_id=82) 2006
23. Hu FB, Stampfer MJ, Rimm E, et al. Dietary fat and coronary heart disease: a comparison of approaches for adjusting for total energy intake and modeling repeated dietary measurements. *American Journal of Epidemiology* 1999;**149**(6):531-40
24. Sterne JAC, Cox DR, Smith GD. Sifting the evidence—what's wrong with significance tests? Another comment on the role of statistical methods. *BMJ* 2001;**322**(7280):226-31 doi: 10.1136/bmj.322.7280.226[published Online First: Epub Date]].
25. Perneger TV. What's wrong with Bonferroni adjustments. *BMJ* 1998;**316**(7139):1236-38 doi: 10.1136/bmj.316.7139.1236[published Online First: Epub Date]].
26. Rothman KJ. No adjustments are needed for multiple comparisons. *Epidemiology* 1990;**1**(1):43-6
27. Hills AP, Byrne NM, Lindstrom R, et al. 'Small changes' to diet and physical activity behaviors for weight management. *Obes. Facts* 2013;**6**(3):228-38 doi: 10.1159/000345030[published Online First: Epub Date]].
28. Krebs J, Elley C, Parry-Strong A, et al. The Diabetes Excess Weight Loss (DEWL) Trial: a randomised controlled trial of high-protein versus high-carbohydrate diets over 2 years in type 2 diabetes. *Diabetologia* 2012;**55**(4):905-14 doi: 10.1007/s00125-012-2461-0[published Online First: Epub Date]].
29. Larsen RN, Mann NJ, Maclean E, et al. The effect of high-protein, low-carbohydrate diets in the treatment of type 2 diabetes: a 12 month randomised controlled trial. *Diabetologia* 2011;**54**(4):731-40
30. Guldbbrand H, Dizdar B, Bunjaku B, et al. In type 2 diabetes, randomisation to advice to follow a low-carbohydrate diet transiently improves glycaemic control compared with advice to follow a low-fat diet producing a similar weight loss. *Diabetologia* 2012:1-10 doi: 10.1007/s00125-012-2567-4[published Online First: Epub Date]].
31. Jenkins DJ, Kendall CW, McKeown-Eyssen G, et al. Effect of a low-glycemic index or a high-cereal fiber diet on type 2 diabetes: a randomized trial. *JAMA: Journal of the American Medical Association* 2008;**300**(23):2742-53
32. Wolever TM, Gibbs AL, Mehling C, et al. The Canadian Trial of Carbohydrates in Diabetes (CCD), a 1-y controlled trial of low-glycemic-index dietary carbohydrate in type 2 diabetes: no effect on glycated hemoglobin but reduction in C-reactive protein. *Am. J. Clin. Nutr.* 2008;**87**(1):114-25 doi: 10.1111/j.1365-277X.2008.01114.x [pii][published Online First: Epub Date]].

- 1  
2  
3  
4  
5  
6  
7  
8  
9  
10  
11  
12  
13  
14  
15  
16  
17  
18  
19  
20  
21  
22  
23  
24  
25  
26  
27  
28  
29  
30  
31  
32  
33  
34  
35  
36  
37  
38  
39  
40  
41  
42  
43  
44  
45  
46  
47  
48  
49  
50  
51  
52  
53  
54  
55  
56  
57  
58  
59  
60
33. Bhardwaj S, Passi SJ, Misra A. Overview of trans fatty acids: Biochemistry and health effects. *Diabetes & Metabolic Syndrome: Clinical Research & Reviews* 2011;**5**(3):161-64 doi: 10.1016/j.dsx.2012.03.002[published Online First: Epub Date].
  34. Babio N, Balanza R, Basulto et al. Dietary fibre: influence on body weight, glycemic control and plasma cholesterol profile. *Nutr. Hosp.* 2010;**25**(3):327-40
  35. McFadden CB, Brensinger CM, Berlin JA, Townsend RR. Systematic review of the effect of daily alcohol intake on blood pressure. *Am. J. Hypertens.* 2005;**18**(2):276-86 doi: 10.1016/j.amjhyper.2004.07.020[published Online First: Epub Date].
  36. Castaneda-Gonzalez LM, Bacardi Gascon M, Jimenez Cruz A. Effects of low carbohydrate diets on weight and glycemic control among type 2 diabetes individuals: a systemic review of RCT greater than 12 weeks. *Nutr. Hosp.* 2011;**26**(6):1270-6 doi: 10.1590/s0212-16112011000600013[published Online First: Epub Date].
  37. Hu T, Mills KT, Yao L, et al. Effects of Low-Carbohydrate Diets Versus Low-Fat Diets on Metabolic Risk Factors: A Meta-Analysis of Randomized Controlled Clinical Trials. *Am. J. Epidemiol.* 2012;**176**(suppl 7):S44-S54 doi: 10.1093/aje/kws264[published Online First: Epub Date].
  38. Karelis AD, Lavoie M-E, Fontaine J, et al. Anthropometric, metabolic, dietary and psychosocial profiles of underreporters of energy intake: a doubly labeled water study among overweight/obese postmenopausal women[mdash]a Montreal Ottawa New Emerging Team study. *Eur. J. Clin. Nutr.* 2010(64):68-74 doi: <http://dx.doi.org/10.1038/ejcn.2009.119>[published Online First: Epub Date].
  39. Goris AH, Westterp-Plantenga MS, Westterp KR. Undereating and underrecording of habitual food intake in obese men: selective underreporting of fat intake. *The American Journal of Clinical Nutrition* 2000;**71**(1):130-34
  40. Room R, Mäkelä P, Benegal V, et al. Times to drink: cross-cultural variations in drinking in the rhythm of the week. *Int. J. Public Health* 2012;**57**(1):107-17 doi: 10.1007/s00038-011-0259-3[published Online First: Epub Date].
  41. Black AE. Critical evaluation of energy intake using the Goldberg cut-off for energy intake:basal metabolic rate. A practical guide to its calculation, use and limitations. *International journal of obesity and related metabolic disorders : journal of the International Association for the Study of Obesity* 2000;**24**(9):1119-30
  42. Rennie KL, Coward A, Jebb SA. Estimating under-reporting of energy intake in dietary surveys using an individualised method. *Br. J. Nutr.* 2007;**97**(6):1169-76 doi: S0007114507433086 [pii] 10.1017/S0007114507433086[published Online First: Epub Date].
  43. Hall KD, Sacks G, Chandramohan D, et al. Quantification of the effect of energy imbalance on bodyweight. *The Lancet* 2011;**378**(9793):826-37 doi: [http://dx.doi.org/10.1016/S0140-6736\(11\)60812-X](http://dx.doi.org/10.1016/S0140-6736(11)60812-X)[published Online First: Epub Date].



Table 1: Metabolic characteristics at baseline and 6 months

| Metabolic characteristics                                         | Baseline                     |                             |                              | 6 months                    |                             |                                           | Change (6 months - baseline)                |                                             |                                             |
|-------------------------------------------------------------------|------------------------------|-----------------------------|------------------------------|-----------------------------|-----------------------------|-------------------------------------------|---------------------------------------------|---------------------------------------------|---------------------------------------------|
|                                                                   | Total (n=262)<br>Mean (SD)   | Women (n=87)<br>Mean (SD)   | Men (n=175)<br>Mean (SD)     | Total (n=262)<br>Mean (SD)  | Women (n=87)<br>Mean (SD)   | Men (n=175)<br>Mean (SD)                  | Total (n=262)<br>Mean (SD)                  | Women (n=87)<br>Mean (SD)                   | Men (n=175)<br>Mean (SD)                    |
| Weight, kg                                                        | 88.2 (16.1)                  | 83.1 (17.9)                 | 90.7 (14.5)                  | 85.9 (16.3)                 | 80.7 (17.7)                 | 88.5 (15.0)                               | - 2.3 (3.3) <sup>z</sup>                    | - 2.5 (3.3) <sup>z</sup>                    | - 2.3 (3.3) <sup>z</sup>                    |
| Body mass index, kg/m <sup>2</sup>                                | 30.7 (5.3)                   | 31.9 (6.9)                  | 30.2 (4.7) <sup>a</sup>      | 29.9 (5.4)                  | 30.9 (6.2)                  | 29.4 (4.9)                                | - 0.8 (1.2) <sup>z</sup>                    | - 1 (1.0) <sup>z</sup>                      | - 0.8 (1.1) <sup>z</sup>                    |
| Waist circumference, cm                                           | 105 (12)                     | 102 (13) <sup>1</sup>       | 107 (11)                     | 103 (12)                    | 100 (13)                    | 104 (12)                                  | - 3 (4) <sup>z</sup>                        | - 3 (4) <sup>z</sup>                        | - 3 (4) <sup>z</sup>                        |
| HbA1c, %<br>(mmol/l)                                              | 6.66 (0.94)<br>(49.0 (10.3)) | 6.67 (0.91)<br>(49.0 (9.9)) | 6.65 (0.95)<br>(49.0 (10.4)) | 6.47 (0.89)<br>(47.0 (9.7)) | 6.41 (0.63)<br>(47.0 (6.9)) | 6.51 (0.99) <sup>1</sup><br>(48.0 (10.8)) | - 0.18 (0.72) <sup>z</sup><br>(- 2.0 (7.9)) | - 0.27 (0.63) <sup>z</sup><br>(- 3.0 (6.9)) | - 0.14 (0.75) <sup>x</sup><br>(- 1.5 (8.2)) |
| Total cholesterol, mmol/l                                         | 4.33 (0.90)                  | 4.66 (0.89) <sup>1</sup>    | 4.16 (0.86) <sup>1c</sup>    | 4.29 (0.93)                 | 4.66 (0.98)                 | 4.11 (0.84)                               | - 0.03 (0.69)                               | 0.01 (0.79)                                 | - 0.06 (0.63)                               |
| LDL-cholesterol, mmol/l                                           | 2.30 (0.78)                  | 2.55 (0.81) <sup>3</sup>    | 2.18 (0.74) <sup>2c</sup>    | 2.27 (0.81)                 | 2.51 (0.88) <sup>3</sup>    | 2.15 (0.75) <sup>1</sup>                  | - 0.03 (0.67)                               | - 0.03 (0.76)                               | - 0.03 (0.62)                               |
| HDL-cholesterol, mmol/l                                           | 1.29 (0.33)                  | 1.37 (0.39) <sup>1</sup>    | 1.25 (0.29) <sup>1a</sup>    | 1.34 (0.37)                 | 1.45 (0.47)                 | 1.28 (0.30)                               | 0.05 (0.27) <sup>y</sup>                    | 0.09 (0.37) <sup>x</sup>                    | 0.03 (0.21)                                 |
| Systolic blood pressure, mmHg                                     | 134 (16)                     | 133 (16)                    | 134 (15)                     | 134 (15)                    | 135 (16)                    | 134 (14)                                  | 1 (12)                                      | 2 (13)                                      | 0 (12)                                      |
| Diastolic blood pressure, mmHg                                    | 79 (8)                       | 78 (8)                      | 79 (8)                       | 78 (8)                      | 78 (8)                      | 78 (8)                                    | 0 (7)                                       | 0 (8)                                       | 0 (7)                                       |
| Physical activity<br>(n=223)                                      | (n=223)                      | (n=75)                      | (n=148)                      | (n=223)                     | (n=75)                      | (n=148)                                   | (n=223)                                     | (n=75)                                      | (n=148)                                     |
| Minutes of moderate to vigorous<br>physical activity / day (MVPA) | 26 (21)                      | 21 (18) <sup>12</sup>       | 29 (22) <sup>27</sup>        | 33 (25)                     | 21 (19)                     | 38 (26)                                   | 7 (21)                                      | 1 (12)                                      | 10 (24)                                     |

a = p<0.05; b = p<0.005; c = p<0.001 women vs. men at baseline

x = p<0.05; y = p<0.005; z = p<0.001 baseline vs. 6 month

Numerical superscripts indicate number of participants with missing data for the variable of interest. Cases with missing data are excluded listwise

Table 2: Nutrient intake at baseline and 6 months

| Mean daily intake nutrients       | Baseline                   |                           |                          | 6 months                   |                           |                          | Change (6 months - baseline) |                           |                            |
|-----------------------------------|----------------------------|---------------------------|--------------------------|----------------------------|---------------------------|--------------------------|------------------------------|---------------------------|----------------------------|
|                                   | Total (n=262)<br>Mean (SD) | Women (n=87)<br>Mean (SD) | Men (n=175)<br>Mean (SD) | Total (n=262)<br>Mean (SD) | Women (n=87)<br>Mean (SD) | Men (n=175)<br>Mean (SD) | Total (n=262)<br>Mean (SD)   | Women (n=87)<br>Mean (SD) | Men (n=175)<br>Mean (SD)   |
| Energy (kcal)                     | 1796 (461)                 | 1582 (379)                | 1903 (462) <sup>c</sup>  | 1610 (418)                 | 1459 (326)                | 1685 (439) <sup>c</sup>  | -187 (315) <sup>z</sup>      | - 123 (270) <sup>z</sup>  | - 218 (332) <sup>a,z</sup> |
| Protein (g)                       | 80 (19)                    | 73 (16)                   | 83 (20) <sup>c</sup>     | 74 (19)                    | 68 (13)                   | 77 (20) <sup>c</sup>     | - 6 (17) <sup>z</sup>        | - 5 (15) <sup>y</sup>     | - 6 (19) <sup>z</sup>      |
| Total carbohydrates (g)           | 202 (55)                   | 186 (48)                  | 211 (57) <sup>b</sup>    | 186 (53)                   | 170 (39)                  | 194 (58) <sup>b</sup>    | - 17 (41) <sup>z</sup>       | - 15 (33) <sup>z</sup>    | - 17 (45) <sup>z</sup>     |
| Total sugar (g)                   | 81 (32)                    | 77 (28)                   | 83 (34)                  | 75 (31)                    | 71 (23)                   | 77 (34)                  | - 6 (26) <sup>z</sup>        | - 6 (21) <sup>x</sup>     | - 6 (28) <sup>y</sup>      |
| Starch (g)                        | 119 (36)                   | 105 (30)                  | 126 (37) <sup>c</sup>    | 109 (31)                   | 97 (26)                   | 115 (32) <sup>c</sup>    | -10 (28) <sup>z</sup>        | - 9 (24) <sup>y</sup>     | - 11 (30) <sup>z</sup>     |
| Non-starch polysaccharide (g)     | 17 (5)                     | 16 (5)                    | 17 (5)                   | 16 (5)                     | 15 (4)                    | 17 (5) <sup>a</sup>      | - 1 (5)                      | - 1 (4)                   | 0 (5)                      |
| Total fat (g)                     | 69 (22)                    | 61 (20)                   | 73 (22) <sup>c</sup>     | 61 (20)                    | 56 (19)                   | 64 (20) <sup>b</sup>     | - 8 (18) <sup>z</sup>        | - 5 (17) <sup>x</sup>     | - 9 (18) <sup>z</sup>      |
| Saturated fat (g)                 | 23 (9)                     | 21 (8)                    | 24 (9) <sup>b</sup>      | 20 (9)                     | 19 (9)                    | 21 (9)                   | - 3 (8) <sup>z</sup>         | - 2 (7) <sup>x</sup>      | - 3 (8) <sup>z</sup>       |
| Trans fat (g)                     | 2.3 (1.1)                  | 2.0 (1)                   | 2.4 (1.1) <sup>b</sup>   | 2.1 (1.1)                  | 1.9 (1.1)                 | 2.2 (1.1) <sup>a</sup>   | - 0.2 (1.1) <sup>y</sup>     | - 0.1 (1.1)               | - 0.3 (1.2) <sup>y</sup>   |
| Monounsaturated fat (g)           | 24 (8)                     | 21 (8)                    | 26 (8) <sup>c</sup>      | 22 (8)                     | 20 (7)                    | 23 (8) <sup>b</sup>      | - 2 (7) <sup>z</sup>         | - 1 (8) <sup>x</sup>      | - 3 (7) <sup>z</sup>       |
| Polyunsaturated fat (g)           | 13 (6)                     | 12 (6)                    | 14 (6) <sup>a</sup>      | 12 (4)                     | 11 (4)                    | 13 (5) <sup>a</sup>      | - 1 (5) <sup>z</sup>         | -1 (6)                    | - 1 (5) <sup>y</sup>       |
| Alcohol, median (IQR)(g)          | 7 (0-23)                   | 1 (0-12)                  | 13 (0-27) <sup>a</sup>   | 4 (0-16)                   | 0 (0-11)                  | 5 (0-18) <sup>b</sup>    | 0 (-3-1) <sup>z</sup>        | 0 (-3-4)                  | -3 (-14-0) <sup>c,z</sup>  |
| % Energy from protein             | 18.3 (3.6)                 | 19.0 (3.7)                | 18.0 (3.5) <sup>a</sup>  | 18.8 (3.5)                 | 19.0 (3.3)                | 18.7 (3.6)               | 0.5 (3.7) <sup>z</sup>       | 0.0 (3.6)                 | 0.7 (3.8) <sup>y</sup>     |
| % Energy from total carbohydrates | 43.2 (6.6)                 | 44.8 (6.4)                | 42.4 (6.6) <sup>a</sup>  | 44.1 (6.5)                 | 44.7 (6.2)                | 43.8 (6.6)               | 0.9 (6.0) <sup>z</sup>       | - 0.1 (6.2)               | 1.4 (5.9) <sup>y</sup>     |
| % Energy from total fat           | 33.5 (5.6)                 | 33.4 (5.8)                | 33.6 (5.5)               | 33.3 (5.8)                 | 33.3 (6.4)                | 33.3 (5.4)               | -0.2 (5.9)                   | - 0.1 (6.3)               | - 0.3 (5.7)                |
| % Energy from saturated fat       | 11.2 (3.1)                 | 11.4 (3.4)                | 11.2 (3.1)               | 11.0 (3.4)                 | 11.1 (3.6)                | 10.9 (3.2)               | - 0.3 (3.3)                  | - 0.3 (3.1)               | - 0.3 (3.5)                |
| % Energy from trans fat           | 1.1 (0.4)                  | 1.1 (0.43)                | 1.1 (0.5)                | 1.1 (0.5)                  | 1.1 (0.4)                 | 1.1 (0.5)                | 0.0 (0.5)                    | 0.0 (0.5)                 | 0.0 (0.5)                  |
| % Energy from monounsaturated fat | 11.7 (2.5)                 | 11.5 (2.6)                | 11.9 (2.5)               | 11.9 (2.5)                 | 11.7 (2.7)                | 12.0 (2.5)               | - 0.2 (2.8)                  | 0.2 (3.2)                 | 0.1 (2.6)                  |
| % Energy from polyunsaturated fat | 6.5 (2.2)                  | 6.7 (2.4)                 | 6.4 (2.1)                | 6.6 (1.9)                  | 6.6 (1.9)                 | 6.6 (1.9)                | 0.1 (2.4)                    | 0.0 (2.6)                 | 0.2 (2.3)                  |
| % Energy from total sugar         | 17.2 (5.7)                 | 18.7 (5.5)                | 16.5 (5.6) <sup>b</sup>  | 17.7 (5.7)                 | 18.8 (5.4)                | 17.2 (5.8) <sup>a</sup>  | 0.5 (5.0)                    | 0.2 (5.2)                 | 0.7 (4.9)                  |
| % Energy from alcohol             | 3 (0-8)                    | 1 (0-5)                   | 5 (0-9) <sup>c</sup>     | 2 (0-7)                    | 0 (0-6)                   | 2 (0-7) <sup>a</sup>     | 0 (-3-1) <sup>z</sup>        | 0 (-1-2)                  | -1 (-4-0) <sup>c,z</sup>   |

a = p<0.05; b = p<0.005; c = p<0.001 women vs. men

y = p<0.005; z = p<0.001 baseline vs. 6 months

Table 3: Associations between macronutrients and metabolic outcomes in men (n=148) and women (n=75) who provided physical activity data.

| Macronutrient                                |       | Metabolic outcomes       | Regression coefficient, $\beta$<br>(95% Confidence interval) | p<br>value |
|----------------------------------------------|-------|--------------------------|--------------------------------------------------------------|------------|
| Change to % energy from total carbohydrates  | Men   | HbA1c %<br>(mmol/l)      | -0.003 (-0.006, -0.001)<br>(-0.005 (-0.009, -0.001))         | 0.009      |
|                                              | All   | Total cholesterol        | -0.023 (-0.044, -0.002)                                      | 0.033      |
| Change to fibre (nsp) intake (g)             | Men   | Total cholesterol        | -0.025 (-0.047, -0.003)                                      | 0.023      |
|                                              | All   | LDL cholesterol          | 0.018 (0.003, 0.032)                                         | 0.016      |
| Change to % energy from total fat            | Men   | LDL cholesterol          | 0.024 (0.006, 0.042)                                         | 0.011      |
|                                              | All   | Waist circumference      | 0.014 (0.003, 0.024)                                         | 0.011      |
| Change to % energy from trans fat            | Women | Waist circumference      | 0.029 (0.006, 0.052)                                         | 0.015      |
|                                              |       | Total cholesterol        | 0.399 (0.028, 0.770)                                         | 0.036      |
|                                              |       | LDL cholesterol          | 0.365 (0.042, 0.688)                                         | 0.028      |
| Change to % energy from monounsaturated fats | All   | LDL cholesterol          | 0.036 (0.006, 0.065)                                         | 0.018      |
|                                              | All   | Diastolic blood pressure | 0.217 (0.020, 0.414)                                         | 0.031      |
| Change to % energy from alcohol              | Men   | Diastolic blood pressure | 0.276 (0.055, 0.497)                                         | 0.015      |

All models are adjusted for change in energy intake, outcome at baseline, age, BMI, time since diagnosis, relevant hypoglycaemic mediation (metformin, sulphonylureas, glitazones), lipid lowering medication or anti-hypertensives, dietary supplements, mean daily minutes of moderate to vigorous physical activity.

For each macronutrient listed a 1% (1g for fibre) increase is associated with the change in outcome listed

1  
2  
3 **Dietary changes and associations with metabolic improvements in**  
4 **adults with Type 2 diabetes during a patient-centred dietary**  
5 **intervention: an exploratory-secondary analysis**  
6  
7  
8  
9

10 Corresponding author: Clare England. Tel, +44 (0)117 331 1096. Fax +44(0)117 954 6756. e-  
11 mail: clare.england@bristol.ac.uk.

12  
13  
14 Authors: C. Y., England<sup>1</sup>, J. L., Thompson<sup>3</sup>, R., Jago<sup>1</sup>, A. R., Cooper<sup>1</sup>, R. C. Andrews<sup>2</sup>

15  
16  
17 The study was carried out at The University of Bristol, Senate House, Tyndall Avenue,  
18 Bristol BS8 1TH

19  
20  
21 1. Centre for Exercise Nutrition and Health Sciences, School for Policy Studies, 8 Priory  
22 Road, University of Bristol, BS8 1TZ

23  
24  
25 2. School of Clinical Sciences, University of Bristol, Learning and Research, Southmead  
26 Hospital

27  
28  
29 Bristol BS10 5NB

30  
31  
32 3. University of Birmingham, School of Sport, Exercise & Rehabilitation Sciences,  
33 Edgbaston, Birmingham, B15 2TT

34  
35  
36 Running title: Dietary change in adults with Type 2 diabetes

37  
38  
39 *Keywords: Type 2 diabetes, dietary analysis, dietary change*

40  
41  
42  
43 Bath Research Ethics Committee (05/Q2001/5)

44  
45  
46 Word count

47  
48 Abstract: 299

49  
50 Main text: 3758

51  
52  
53 Number of tables: 3  
54  
55  
56  
57  
58  
59  
60

1  
2  
3 1 Abstract

4  
5 2 *Objectives:* Describe dietary intake of participants enrolled in a non-prescriptive dietary  
6 intervention and ~~Examine dietary dietary~~ changes at 6 months ~~reported during a non-~~  
7 ~~prescriptive dietary intervention~~ and explore whether these changes had a role in observed  
8  
9 4 improvements in HbA1c, weight, lipids and blood pressure.

10  
11  
12 6 *Design:* Secondary analysis of data from the Early ACTivity in Diabetes randomised  
13  
14 7 controlled trial.

15  
16  
17 8 *Participants* 262 patients with newly diagnosed Type 2 diabetes randomised to the dietary  
18  
19 9 intervention.

20  
21 10 *Outcomes and analysis:* Changes in energy intake, macronutrients, fibre and alcohol and in  
22  
23 11 weight, waist circumference, lipids, HbA1c and blood pressure at baseline and 6 months.  
24  
25 12 Multivariate models were used to examine associations between dietary changes and  
26  
27 13 metabolic variables.

28  
29 14 *Results:* Men reported reducing mean energy intake from  $1903 \pm 462$  kcal to  $1685$  kcal  $\pm$   
30  
31 15  $439$  kcal ( $p < 0.001$ ), increasing carbohydrate intake from  $42.4 \pm 6.6\%$  to  $43.8 \pm 6.6\%$   
32  
33 16 ( $p = 0.002$ ) and reducing median alcohol intake from ~~138 (0-27)g  $\pm$  20g~~ to ~~115  $\pm$  14g(0-18)g~~  
34  
35 17 ( $p < 0.001$ ). Women reported reducing mean energy intake from  $1582 \pm 379$  kcal to ~~1450~~  $\pm$   
36  
37 18  $326$  kcal ( $p < 0.001$ ) with no change to macronutrient distribution and ~~no reduction in~~ alcohol.  
38  
39 19 Fibre intake was maintained. In men ( $n = 148$ ) weak and clinically insignificant associations  
40  
41 20 were found between increased carbohydrates and reduction in HbA1c ( $\beta = -0.003$  [-0.006, -  
42  
43 21 0.001];  $p = 0.009$ ), increased fibre and reduction in total cholesterol ( $\beta = -0.023$  [-0.044, -  
44  
45 22 0.002];  $p = 0.033$ ), decreased total fat and reduction in LDL-cholesterol ( $\beta = 0.024$  [0.006,  
46  
47 23 0.001];  $p = 0.011$ ), and decreased alcohol and reduction in diastolic blood pressure ( $\beta = 0.276$   
48  
49 24 [0.055, 0.497];  $p = 0.015$ ). In women ( $n = 75$ ) associations were found between a decrease in  
50  
51 25 trans-fats and reductions in waist circumference ( $\beta = -0.029$  [0.006, 0.052];  $p = 0.015$ ), total  
52  
53 26 cholesterol ( $\beta = 0.399$  [0.028, 0.770];  $p = 0.036$ ) and LDL cholesterol ( $\beta = 0.365$  [0.042, 0.668];  
54  
55 27  $p = 0.028$ ).

56  
57  
58 28 *Conclusion:* Clinically ~~important~~ significant metabolic improvements observed in a patient-  
59  
60 29 centred dietary intervention ~~were~~ are not explained by changes in ~~percentage intake of~~

1  
2  
3 30 macronutrients. However, a non-prescriptive approach may promote a reduction in total  
4  
5 31 energy intake whilst maintaining fibre consumption.  
6  
7  
8  
9  
10  
11  
12  
13  
14  
15  
16  
17  
18  
19  
20  
21  
22  
23  
24  
25  
26  
27  
28  
29  
30  
31  
32  
33  
34  
35  
36  
37  
38  
39  
40  
41  
42  
43  
44  
45  
46  
47  
48  
49  
50  
51  
52  
53  
54  
55  
56  
57  
58  
59  
60

For peer review only

32 Article summary33 Strengths and limitations

- 34 • Describes the dietary intake of people soon after diagnosis of Type 2 DM living in the  
35 UK, the dietary changes made during a dietary intervention and explores amines  
36 associations between dietary changes and changes in metabolic outcomes. This  
37 intervention was based on the dietary advice that is given in routine clinical practice  
38 in the UK.  
39
- 40 • Only 53% of the participants provided food diary data at the end of the trial and these  
41 people showed greater improvements in metabolic outcomes than those who did not  
42 return food diaries. It is probable that they were more motivated than a typical patient  
43 group and this limits the generalizability of the findings.



## 44 Introduction

45 Dietary management is recognised as highly important in the treatment of Type 2 diabetes  
46 (Type 2 DM). Based upon meta-analyses of exercise and diet studies, the American Diabetes  
47 Association (ADA) and European Association for the Study of Diabetes (EASD) recommend  
48 that lifestyle interventions should be initiated as the first step in treating new-onset Type 2  
49 DM [1]. Over the last 3 years, The Look Ahead research group, the Lifestyle Over and Above  
50 Drugs in Diabetes (LOADD) and Early Activity in Diabetes (Early ACTID) randomised  
51 controlled trials (RCTs) have shown that dietary interventions which target weight reduction  
52 are beneficial and improve glycaemic control [2-4]. These trials achieved reductions in  
53 HbA1c comparable to reductions demonstrated in patients starting metformin or a gliptin as  
54 monotherapies [5] and, although the Look Ahead trial showed no reduction in cardiovascular  
55 events after 9.6 years, participants in the intervention arm were less likely to be treated with  
56 insulin [6].

57  
58 It has been reported that changes to the macronutrient composition of the diet may impact  
59 upon glycaemic control, blood lipids and weight [7], but the effect of specific dietary  
60 changes on these metabolic outcomes are still unclear and no single 'diet for diabetes' has  
61 been identified [8]. In recognition of this, both the 2012 ADA and EASD joint guidelines and  
62 2011 Diabetes UK nutritional guidelines emphasise the importance of an individualised,  
63 patient-centred approach to diet rather than a prescriptive approach [1,9]. This approach  
64 recognises that different people have different individual dietary habits and may find certain  
65 dietary changes more straightforward than others. There is evidence that men and women  
66 living in the UK have differing dietary patterns [10]. Men have been reported to drink more  
67 alcohol and consume more meat but less fruit and diet soft drinks than women [11]. Few  
68 studies have looked at what changes to macronutrients are made to macronutrients in  
69 response to non-prescriptive dietary advice, whether men and women make different changes  
70 this type of dietary advice and whether how these changes impact on metabolic control.

71  
72 The Early ACTID trial included a non-prescriptive, patient-centred dietary intervention. The  
73 trial aimed to assess whether adding physical activity to a dietary intervention produced  
74 greater benefit than diet alone or usual care in individuals newly diagnosed with Type 2 DM  
75 [4]. Participants who received the lifestyle interventions had better HbA1c, lower body

1  
2  
3 76 weight, less insulin resistance, and were on less medication than the control group at 6 and 12  
4 77 months. During the intervention participants in this cohort reported small changes to higher  
5 calorie, low fibre foods. Examination of the specific changes to foods and food groups  
6 reported by participants has been previously published [12] and this current paper focuses on  
7 macronutrients.  
8  
9  
10  
11

12  
13  
14 82 The aim of this paper is to describe baseline energy and macronutrient intakes of men and  
15 women who were enrolled into the dietary intervention in the Early ACTID study and to  
16 examine the reported dietary changes made after 6 months. by men and women newly  
17 diagnosed with Type 2 DM who were enrolled into the dietary intervention in the Early  
18 ACTID study.  
19  
20  
21  
22

23  
24 87 We conducted exploratory analysis to examine the following hypotheses:

- 25  
26  
27 88 • Men and women with Type 2 DM make different dietary changes in response to a  
28 dietary intervention.  
29  
30 90 • The changes to energy intake and macronutrients are associated with the  
31 observed beneficial changes to glycaemic control, weight, waist circumference, blood  
32 pressure and lipids. The associations between changes to energy, macronutrients and  
33 metabolic outcomes were explored to determine the effect of dietary changes on the  
34 metabolic variables.  
35  
36  
37  
38

## 39 Subjects and methods

### 40 41 96 *Subjects*

42  
43  
44 97 This paper is an exploratory secondary analysis of data from the Early ACTID randomised  
45 98 controlled trial. Early ACTID was a diet and physical activity trial involving patients living in  
46 99 the South West of England who were recruited within 5 to 8 months of a diagnosis of Type 2  
47 100 DM from December 2005 to September 2008. Full trial procedures with the CONSORT  
48 101 diagram and results are described elsewhere [4, 13, 14]. The analysis is limited to participants  
49 102 in the intervention arms who returned valid food diary data.  
50  
51  
52  
53

### 54 55 103 *Overview of the dietary intervention*

1  
2  
3 104 Patients in the diet alone and the diet and physical activity groups received the same dietary  
4 105 intervention. For the first 6 months the intervention aimed to promote dietary change. At  
5 106 randomisation patients attended a one-hour appointment with a study dietitian followed by 2  
6 107 further visits of 30 minutes. These visits were supported by 6 additional visits with a research  
7 108 nurse, where 15 minutes were used to discuss dietary matters for both groups, reinforcing  
8 109 dietary goals, and 15 minutes to discuss either physical activity or other matters pertinent to  
9 110 the patient, depending upon intervention group allocated to. Maintenance was the primary  
10 111 goal of the second 6 months and consisted of 2 more 30 minute dietitian visits and 4  
11 112 additional visits with the research nurses.

12  
13  
14  
15  
16  
17  
18  
19 113 The dietary intervention was based upon the 2003 Diabetes UK healthy eating guidelines [15]  
20 114 and employed goal oriented motivational interviewing [16]. Patients were encouraged to  
21 115 discuss their reasons for change, any ambivalence about change and to set their own dietary  
22 116 goals and identify their own strategies for achieving these goals. Prescriptive daily  
23 117 requirements for energy or macronutrients were not calculated unless requested by the patient  
24 118 and prescriptive meal plans or food lists were not used. Instead patients received study  
25 119 specific written dietary information at each visit (available here:  
26 120 <http://jcrubristol.org.uk/EA/ACTID%20patients%20Handbook/Forms/AllItems.aspx>) and  
27 121 were encouraged to use this to evaluate their own eating habits. The materials included  
28 122 information on maintaining a regular meal pattern and including starchy carbohydrates as a  
29 123 part of each meal, reducing total, saturated and *trans* fat intake, limiting non-milk extrinsic  
30 124 sugars, aiming for 5 portions a day of fruit and vegetables and gave guidance on portion  
31 125 control. Specific food choices were discussed and participants were advised on choosing  
32 126 wholegrain and higher fibre foods, reducing fatty and processed meats and; high fat dairy  
33 127 products, e and increasing oily fish and limiting foods like cakes, biscuits, salty snacks and  
34 128 take-away meals. The benefit of aiming for a 5 to 10% weight loss by reducing overall  
35 129 energy intake was discussed with everyone. Goals were reviewed at each appointment and  
36 130 successes, difficulties and new strategies discussed. Patients were encouraged to self-monitor  
37 131 their weight and diet.

### 38 39 40 41 42 43 44 45 46 47 48 49 50 51 *Measurements*

52  
53  
54 133 Measures were taken at baseline (prior to randomisation) and repeated 6 and 12 months later.  
55 134 Baseline and 6 month data were used in the current analysis, since outcomes at 6 months

1  
2  
3 135 were defined as the primary endpoint of the study. Measurements used in this analysis were  
4 136 weight, height (to calculate body mass index (BMI)), waist circumference, blood pressure,  
5 137 HbA1c, fasting lipids and minutes of moderate to vigorous physical activity (MVPA)  
6 138 measured using accelerometry and defined as activity expending greater than 3kcal/kg/hour .  
7  
8 139 As previously described, blood measurements and anthropometric measures were carried out  
9  
10 140 using standardised procedures [13]. Smoking habits and use of dietary supplements were  
11  
12 141 assessed by a research nurse. The UK Index of Multiple Deprivation (IMD) 2007 was  
13  
14 142 calculated from home postcode and used as an indicator of socio-economic position [17].  
15  
16

### 17 143 *Dietary assessment and analysis*

18  
19  
20 144 Patients in the intervention arms were asked to complete 4-day food diaries, to include 2  
21 145 weekdays and 1 weekend day, prior to each dietitian appointment, recording all foods and  
22  
23 146 drinks consumed during those 4 days. Portion sizes were estimated using household measures  
24  
25 147 and package weights and brands indicated where appropriate. The diaries were discussed  
26  
27 148 during the appointments and used to identify potential areas for change, difficulties in making  
28  
29 149 change, and for patients to observe change in their diets over time. Patients were asked to  
30  
31 150 return all the diaries at the final visit for further analysis. Those who did not return diaries at  
32  
33 151 the visit were reminded by telephone and e-mail to post outstanding diaries to the research  
34  
35 152 team after the visit.

36  
37 153 Baseline and 6-month food diaries were coded by one coder and checked for accuracy and  
38  
39 154 agreement by a second coder, using the dietary coding programme Diet in Data Out (DIDO),  
40  
41 155 developed at the Medical Research Council Human Nutrition Unit in Cambridge, UK [18].  
42  
43 156 Diaries were analysed with the nutrient analysis programme Bristol General Analysis of  
44  
45 157 Dietary Experiments (BRIGADE) [19]. The nutrient database is based on *McCance and*  
46  
47 158 *Widdowson's Composition of Foods, 5<sup>th</sup> edition* [20], updated with the supplements to that  
48  
49 159 edition, new data from the 6<sup>th</sup> edition and manufacturers' data. Additional nutrient data from  
50  
51 160 the INTERMAP nutrient database for the UK were also used [21]. If no portion size  
52  
53 161 information was given, age-appropriate portion sizes were assigned [22]. The mean daily  
54  
55 162 consumption of each nutrient was calculated for each participant.

### 56 163 *Statistical analysis*

1  
2  
3 164 As the dietary intervention was designed to be identical for both intervention groups and  
4 165 there were no difference in outcomes between the diet and diet and physical activity groups,  
5 166 the data were analysed as a cohort. Patients in the usual care group were excluded from the  
6 167 analysis since they did not receive the dietary intervention and were not asked to complete a  
7 168 diary at 6 months. Descriptive statistics were used for patient characteristics and for intakes  
8 169 of macronutrients at baseline and 6 months. Variables were checked for normal distribution;  
9 170 non-normal variables were log transformed prior to analysis. For ease of interpretation,  
10 171 arithmetic means and back transformed variables are presented. Independent *t*-tests were used  
11 172 to explore differences in continuous variables between men and women at baseline and  
12 173 between those who did and did not return food diaries, and chi-squared tests were used to  
13 174 explore differences in dichotomous variables. Paired sample *t*-tests were used to describe  
14 175 differences in energy and macronutrient intake between baseline and 6 months. McNemar  
15 176 tests were used to explore differences in numbers of people meeting recommendations at  
16 177 baseline and 6 months. As alcohol variables could not be transformed, the Mann Whitney U  
17 178 and paired sample Wilcoxon signed rank test were used to describe differences. Cases with  
18 179 missing data were excluded listwise. Data were assumed to be randomly missing and table 1  
19 180 includes numerical superscripts to indicate the number of participants with missing data for  
20 181 the variable of interest.

21 182 Multivariate regression models were used to conduct exploratory analysis to investigate  
22 183 associations between changes in energy and macronutrient intake and the metabolic variables  
23 184 at 6 months in those who provided valid physical activity data. Changes in energy intake  
24 185 were explored using a standard multivariate model. Each macronutrient was explored  
25 186 independently using a multivariate nutrient density model to adjust for change in energy  
26 187 intake. Change in percentage energy from each macronutrient was calculated and entered into  
27 188 the model with change in total energy included as a covariate. Change in fibre intake was  
28 189 explored using a standard multivariate model and entered as an absolute intake (in grams)  
29 190 with change to total energy intake as a covariate [23]. Models were adjusted for age, BMI,  
30 191 time since diagnosis, minutes of moderate to vigorous physical activity (MVPA) and  
31 192 dichotomous yes/no variables for smoking status, relevant lipid lowering, blood pressure and  
32 193 diabetes medication and dietary supplement use at 6 months.

33 194 Due to the number of different analyses that were conducted the results are interpreted in  
34 195 terms of strength of evidence of associations [24]. This is an exploratory analysis and as such

196 | has not been adjusted for multiple comparisons [25,26], consequently p values of <0.05 are  
197 | interpreted as some evidence of association, p<0.01 as increasing evidence and p<0.001 as  
198 | strong evidence.

## 199 | Results

### 200 | *Study participants*

201 | A total of 593 patients were recruited into the Early ACTID study, with 494 being assigned to  
202 | one of the intervention groups. 396 (80%) patients were recorded as completing food diaries  
203 | at both baseline and 6 months but only 262 (53%) patients returned them. Metabolic and  
204 | dietary outcomes at baseline and 6 months are presented for these 262 patients. ~~and 223 of~~  
205 | ~~these had valid accelerometry data at both time points.~~ At 6 months 491 (99%) patients  
206 | assigned to one of the intervention arms remained in the study, with 434 (88%) attending all  
207 | scheduled visits up to that point and a further 37 (8%) attending all except one.

208 | Mean age was 62.4 (9.0) years, 97% of patients were white, 83% were married or with a long  
209 | term partner and 41% were in the lowest IMD quartile. At baseline 104 (40%) of participants  
210 | were on oral hypoglycaemic medication, 170 (65%) on lipid lowering medication and 174  
211 | (66%) on blood pressure medication. Only 6% of patients were current smokers at baseline.

212 | Men and women had similar characteristics, although there was some evidence that men were  
213 | more likely to be on lipid lowering medication than women (69% vs. 56%, p=0.041). At 6  
214 | months, 105 (40%) of participants were on oral hypoglycaemic medication, although 12 (5%)  
215 | participants had increased the dose and 4 (2%) had decreased; 177 (68%) were on lipid  
216 | lowering medication and 175 (67%) were on blood pressure medication.

217 | Compared to the patients who did not return food diaries, those who did were older (62 years  
218 | vs 57 years, p<0.001), with a lower mean weight (88.2 kg vs 93.3 kg, p=0.001), lower mean  
219 | BMI (30.7 vs 32.5, p=0.001) and lower mean waist circumference (105 cm vs 108 cm,  
220 | p=0.025), but there was no difference in glycaemic control, lipids and blood pressure.

### 221 | *Metabolic outcomes*

222 | Table 1 shows the metabolic outcomes at baseline and 6 months for those who returned food  
223 | diaries. There was no difference in glycaemic control or blood pressure between men and



224 women, but women had higher total (p<0001), LDL (p<0.001) and HDL (p=0.015)  
225 cholesterol levels.

226 Weight, waist circumference and BMI improved at 6 months for both men and women  
227 (p<0.001). Men and women improved their HbA1c (men: p=0.006; women: p<0.001). Men  
228 improved their fasting blood glucose (p=0.006) and there is some evidence that women  
229 increased their HDL cholesterol (p=0.033).

230 At 6 months those who returned food diaries had lost more weight (2.4 kg vs 1.3 kg,  
231 p=0.001), reduced waist circumference more (2.7 cm vs 1.3 cm, p=0.022) and reduced  
232 HbA1c (0.18% (2 mmol/l) vs 0% (0 mmol/l), p=0.02).

### 233 *Nutrient analysis*

234 Table 2 shows the mean reported energy and nutrient intakes at baseline and 6 months and  
235 their mean reported changes.

236 At baseline participants reported generally good dietary habits. 61% of women and 59% of  
237 men reported the recommended total fat intake (less than 35% of energy from total fat) and  
238 55% of women and 66% of men reported a low to moderate carbohydrate intake (<45% of  
239 energy). Men were more likely to drink alcohol and more likely to drink to excess than  
240 women with 49% of women and 28% of men recording no alcohol during the 4 days and 8%  
241 of women and 19% of men reporting more than 30g of alcohol per day (p=0.022).

242 At 6 months mean daily reported energy intake was reduced by 187 kcal (p<0.001). Men  
243 reduced their energy intake more than women (218 ± 332 vs. 123 ± 270 kcal/day, p=0.022).  
244 This was achieved by small reductions in all macronutrients, whilst maintaining fibre intake.  
245 The mean percentage energy from macronutrients was unchanged for women whilst men  
246 reported a small mean increase of 1.4 ± 5.9% (p<0.001) of energy from carbohydrates. Men  
247 reported reducing ~~mean~~ median alcohol intake (p<0.001), with 40% reporting no alcohol  
248 during the 4 days and 15% reporting more than 30g per day. There was no reported  
249 median~~mean~~ change in alcohol intake for women. Despite no mean change to energy from  
250 saturated fat, more men met recommendations at 6 months (35% men at baseline vs. 49% at 6  
251 months reporting less than 10% energy from saturated fat, p=0.007). There was no change in  
252 the number of women meeting recommendations (40% baseline vs 44% at 6 months,  
253 p=0.71).



254 | Valid physical activity data and dietary data were provided by 223 (45%) participants. Table  
255 | 3 shows the regression coefficients and confidence intervals for changes in energy and  
256 | macronutrients that show evidence for associations with specific metabolic variables. In men  
257 | a 1% reduction in energy from alcohol was associated with a 0.276 mmHg reduction in  
258 | diastolic blood pressure (95% CI= 0.055 to 0.497). In women a 1% reduction in energy from  
259 | trans-fat was associated with a decrease in cholesterol of 0.399 mmol/l (95% CI= 0.028 to  
260 | 0.770). In men a 1% increase in energy from carbohydrate was associated with a decrease in  
261 | HbA1c of 0.003% (95% CI= -0.006 to -0.001). There were no associations between change  
262 | in energy intake and the metabolic variables.

## 264 | Discussion

### 265 | *Main findings*

266 | The main findings from this exploratory analysis are that patients who were randomised to  
267 | the intervention arms in the Early ACTID study and returned food diaries reported a good  
268 | diet at baseline but still achieved small dietary changes. They reported a mean decrease in  
269 | energy intake of around 200 kcal per day, during the first 6 months. This is a modest  
270 | reduction in calorie intake but, if sustained, will have an impact on weight and glycaemic  
271 | control. It has been argued that long-term small changes are more effective for weight  
272 | management than short-term large changes [27]. Men reported a reduced alcohol intake that  
273 | produced a greater reduction in energy and reported a small increase in the percentage energy  
274 | from carbohydrate. Women reported modest reductions to all macronutrients but made no  
275 | changes to alcohol, their energy reduction was less and the macronutrient ratio of their diets  
276 | did not change. Both sexes maintained fibre intake. Although changes in percentage intake of  
277 | macronutrients were associated with metabolic outcomes, these effect sizes were too small to  
278 | be of clinical significance.

279 | ~~These results suggest that current recommendations that dietary advice is personalised,  
280 | flexible and focuses on realistic, achievable, and sustainable reductions in intake may  
281 | promote dietary change in people with T2-DM.~~

### 282 | *Comparison with other studies*

1  
2  
3 283 The Early ACTID dietary intervention was a pragmatic, ‘real world’ intervention, in which  
4 284 participants discussed dietary advice with dietitians and nurses to decide on their own dietary  
5 285 changes. The approach contrasts with dietary studies where participants are asked to make  
6 286 specific, prescribed changes to the macronutrient composition, by lowering carbohydrate and  
7 287 increasing protein [28-30] or to lower the glycaemic index [31 ,32]. The LOADD trial [3]  
8 288 based a successful dietary intervention in patients with poor glycaemic control on very  
9 289 similar recommendations to those used in the Early ACTID intervention, but total energy  
10 290 intake and macronutrient ratios for each participant were calculated and diets were prescribed  
11 291 according to these calculations taking into account personal preference, budget and  
12 292 sociocultural factors. The Early ACTID intervention did not compare a prescriptive with a  
13 293 non-prescriptive approach so cannot be used to demonstrate that this is superior but  
14 294 reductions in weight, waist circumference and HbA1c were achieved that are comparable to  
15 295 those achieved during these interventions. Withdrawal rates for prescriptive dietary  
16 296 interventions range from 10% to 30% and these higher withdrawal rates may suggest that in  
17 297 routine clinical care a more flexible approach can be advantageous in promoting retention. Of  
18 298 those participants in Early ACTID who either did not attend all appointments or withdrew  
19 299 completely, only one person stated that they did not see the benefit of the trial. The majority  
20 300 could not schedule all 9 dietitian and nurse visits because of other commitments, 5 cited other  
21 301 health issues, 3 moved too far away, 1 said they ‘did not want to diet,’ 1 wanted to take  
22 302 orlistat from baseline and 3 gave no reasons. What is common to intervention trials in  
23 303 diabetes is that patients receive individual support and attend multiple appointments with a  
24 304 dietitian or a health practitioner who is expert in promoting dietary change. It is important to  
25 305 emphasise that this model is not routinely replicated in primary care for patients with Type 2  
26 306 DM.

27  
28  
29  
30  
31  
32  
33  
34  
35  
36  
37  
38  
39  
40  
41  
42  
43  
44 307 Exploratory analysis of the associations between specific dietary changes and metabolic  
45 308 outcomes found small have not, as far as we are aware, previously been examined in patients  
46 309 with Type 2 DM. Effect sizes were small and not that are not clinically important, significant  
47 310 but they are consistent with existing nutritional data on the benefits of a reduction in trans fats  
48 311 on lipids and waist circumference [33], an increase in fibre on LDL cholesterol [34] and a  
49 312 reduction in alcohol and blood pressure [35]. It is of interest that this analysis found that there  
50 313 was no benefit in carbohydrate reduction in men with good glycaemic control who are  
51 314 already consuming a low to moderate carbohydrate diet. It is not possible to determine

1  
2  
3 315 whether there is an optimum macronutrient distribution for T2 DM from this analysis,  
4 316 particularly in those with poor glycaemic control, but there is no unequivocal evidence that  
5 317 low carbohydrate diets produce better blood glucose control or weight loss than higher  
6 318 carbohydrate diets [36]. A meta-analysis of low carbohydrate diets versus low fat diets  
7 319 conducted in 2012 [37] concluded that there was evidence of a small but beneficial effect on  
8 320 lipid profiles of a low (defined as <45% energy from carbohydrate) or very low carbohydrate  
9 321 (<60g carbohydrate) diet but no difference in improvements to weight or glycaemic control.  
10 322 Larsen et al [29] correlated dietary change with metabolic outcomes and found associations  
11 323 with energy reduction and HbA1c and waist circumference.

### 12 324 *Strengths and weaknesses*

13 325 To our knowledge this is the first study to describe the dietary intake of people soon after  
14 326 diagnosis with Type 2 DM living in the UK, the dietary changes made during an intervention  
15 327 based on patient-centred, non-prescriptive dietary advice and that examines associations  
16 328 between dietary change and metabolic variables. The demographics of the Early ACTID  
17 329 participants included in this analysis suggest that these findings are only representative of the  
18 330 white population; however the sample is socio-economically diverse with 40% of participants  
19 331 living in areas of high economic deprivation. Ethical approval was granted to make no  
20 332 changes to hypoglycaemic, lipid lowering or blood pressure medications during the first 6  
21 333 months, unless absolutely necessary and this was controlled by a strict protocol. Due to small  
22 334 numbers those participants who made medication changes were included in the analysis  
23 335 without correction.

24 336 The study has important weaknesses. Only 53% of the participants returned baseline and 6  
25 337 month food diaries at the end of the trial and these people had a lower BMI and waist  
26 338 circumference at baseline and achieved greater metabolic improvements. The participants  
27 339 who did not return diaries reported mislaying them which may indicate less motivation and  
28 340 less engagement with the trial. Participants who did return diaries could have been more  
29 341 motivated to make dietary changes than a typical patient population, and, given that their  
30 342 diets were good at baseline, may already have made dietary changes prior to entry into the  
31 343 Early ACTID study. The relative lack of dietary data limits our ability to generalise these  
32 344 findings to broader patient groups. Furthermore this was an exploratory analysis using an  
33 345 existing dataset and as such an estimation of sample size was not conducted in advance. .

1  
2  
3 346 However, post hoc sample calculations indicate that the study was underpowered to detect small  
4 347 associations between dietary changes and metabolic outcomes, having 15% power for women and  
5  
6 348 52% for men at an alpha of 0.05.  
7  
8

9 349

10  
11 350 The use of any self-reported measure of diet, including 4-day food diaries, is a recognised  
12 351 limitation in dietary studies. Under-reporting of food intake and selective under-reporting or  
13  
14 352 under-eating of foods perceived to be ‘bad’ are commonly documented, especially in people  
15  
16 353 who are obese [38 ,39]. Measurement of alcohol can be problematic due to the episodic  
17 354 nature of consumption, although including at least one weekend day can improve estimates  
18 355 by including alcohol consumption of ‘weekend-only’ drinkers [40]. Methods exist to estimate  
19  
20 356 under-reporting, using calculated basal metabolic rate and estimates of physical activity [41  
21 357 ,42] but these methods assume that an individual’s weight is stable and are consequently  
22  
23 358 inappropriate for use during a weight loss trial. It should be noted that other dietary  
24  
25 359 interventions in patients with Type 2 DM have reported similar energy intakes [28 ,31] and  
26 360 an energy reduction of around 200kcal/day is plausible assuming a dynamic model of energy  
27  
28 361 balance [43] and given the modest weight reduction observed. It is also important to note that  
29  
30 362 this is a secondary analysis so cause and effect cannot be assumed. It was not possible to  
31 363 perform a formal mediation analysis since participants from the control arm were not asked to  
32  
33 364 complete a food diary at 6 months.  
34  
35

36  
37 365 *Conclusion*  
38

39 366 The Early ACTID trial indicates that a flexible, non-prescriptive approach to dietary advice  
40 367 based on standard healthy eating guidelines in Type 2 DM given soon after diagnosis may be  
41  
42 368 effective in promoting small dietary change, even in patients with good glycaemic control.  
43  
44 369 This supports current clinical practice and guidelines. The current analysis suggests that  
45  
46 370 changes in percentage intake of macronutrients did not have any clinically significant effect  
47  
48 371 on metabolic outcomes during the trial but this needs confirmation in a larger cohort, with  
49  
50 372 less good glycaemic control. Further research is needed on whether dietary changes made  
51  
52 373 using a non-prescriptive approach are sustainable and beneficial in the longer term in a more  
53  
54 374 typical patient population.  
55  
56  
57  
58  
59  
60

### Acknowledgements

We would like to acknowledge the participants in the Early ACTID trial, members of the Early ACTID team and steering committee, Dr Pauline Emmett for advice on dietary analysis, Dr Rosemary Greenwood for advice on statistical analysis and Professor Debbie Sharp for assistance in manuscript preparation.

### Funding

The Early ACTID trial was supported by Diabetes UK, the UK Department of Health and Western Comprehensive Local Research Network. Pilot dietary analysis was supported by the Above and Beyond Foundation. C.Y. England is supported by NIHR Clinical Doctoral Research Fellowship 10-017.

### Authors' contributions

This work forms part of the PhD of CYE which is supervised by RCA, JLT and RJ. RCA led the Early ACTID study and advised on clinical application of this work. CYE participated in data collection, data entry and was responsible for data analysis with guidance from JLT and RJ. ARC was responsible for the design of the ACTID physical activity intervention and for processing and analysis of the physical activity data. The first draft of the manuscript was prepared by CYE with critical input and revisions by all other authors. All authors approved the final manuscript.

### Conflicts of interests

The authors declare that they have no conflict of interest

## References

1. Inzucchi S, Bergenstal R, Buse J, et al. Management of hyperglycaemia in type 2 diabetes: a patient-centered approach. Position statement of the American Diabetes Association (ADA) and the European Association for the Study of Diabetes (EASD). *Diabetologia* 2012;**55**(6):1577-96 doi: 10.1007/s00125-012-2534-0[published Online First: Epub Date]].
2. Wing RR, Lang W, Wadden TA, et al. Benefits of Modest Weight Loss in Improving Cardiovascular Risk Factors in Overweight and Obese Individuals With Type 2 Diabetes. *Diabetes Care* 2011;**34**(7):1481-86 doi: 10.2337/dc10-2415[published Online First: Epub Date]].
3. Coppel KJ, Kataoka M, Williams SM, Chisholm AW, Vorgers SM, Mann JI. Nutritional intervention in patients with type 2 diabetes who are hyperglycaemic despite optimised drug treatment - Lifestyle Over and Above Drugs in Diabetes (LOADD) study: randomised controlled trial. *BMJ* 2010;**341** doi: 10.1136/bmj.c3337[published Online First: Epub Date]].
4. Andrews RC, Cooper AR, Montgomery AA, et al. Diet or diet plus physical activity versus usual care in patients with newly diagnosed type 2 diabetes: the Early ACTID randomised controlled trial. *Lancet* 2011;**378**(9786):129-39
5. Aschner P, Katzeff HL, Guo H, et al. Efficacy and safety of monotherapy of sitagliptin compared with metformin in patients with type 2 diabetes. *Diabetes Obes. Metab.* 2010;**12**(3):252-61 doi: 10.1111/j.1463-1326.2009.01187.x[published Online First: Epub Date]].
6. The Look AHEAD Research Group. Cardiovascular Effects of Intensive Lifestyle Intervention in Type 2 Diabetes. *N. Engl. J. Med.* 2013;**369**(2):145-54 doi: doi:10.1056/NEJMoa1212914[published Online First: Epub Date]].
7. Ajala O, English P, Pinkney J. Systematic review and meta-analysis of different dietary approaches to the management of type 2 diabetes. *Am. J. Clin. Nutr.* 2013;**97**(3):505-16
8. Franz MJ, Powers MA, Leontos C, et al. The Evidence for Medical Nutrition Therapy for Type 1 and Type 2 Diabetes in Adults. *J. Am. Diet. Assoc.* 2010;**110**(12):1852-89 doi: 10.1016/j.jada.2010.09.014[published Online First: Epub Date]].
9. Dyson PA, Kelly T, Deakin T, et al. Diabetes UK evidence-based nutrition guidelines for the prevention and management of diabetes. *Diabetic. Med.* 2011;**28**(11):1282-88 doi: 10.1111/j.1464-5491.2011.03371.x[published Online First: Epub Date]].
10. Northstone K, Emmett PM. Dietary patterns of men in ALSPAC: associations with socio-demographic and lifestyle characteristics, nutrient intake and comparison with women's dietary patterns. *Eur. J. Clin. Nutr.* 2010;**64**(9):978-86
11. Hoare J, Henderson L, Bates CJ. National Diet and Nutrition Survey: adults aged 19 to 64 years. Volume 5: Summary report., 2004.
12. England CY, Andrews R, Jago R, Thompson JL. Changes in reported food intake in adults with type 2 diabetes in response to a nonprescriptive dietary intervention. *J. Hum. Nutr. Diet.* 2013:n/a-n/a doi: 10.1111/jhn.12154[published Online First: Epub Date]].
13. Cooper A, Sebire S, Montgomery A, et al. Sedentary time, breaks in sedentary time and metabolic variables in people with newly diagnosed type 2 diabetes. *Diabetologia* 2012;**55**(3):589-99 doi: 10.1007/s00125-011-2408-x[published Online First: Epub Date]].
14. Malpass A, Andrews R, Turner KM. Patients with Type 2 Diabetes experiences of making multiple lifestyle changes: A qualitative study. *Patient Educ. Couns.* 2009;**74**(2):258-63 doi: 10.1016/j.pec.2008.08.018[published Online First: Epub Date]].
15. Connor H, Annan F, Bunn E, et al. The implementation of nutritional advice for people with diabetes. *Diabetic. Med.* 2003;**20**(10):786-807
16. Miller WR. Motivational interviewing: research, practice, and puzzles. *Addict. Behav.* 1996;**21**(6):835-42 doi: 0306460396000445 [pii][published Online First: Epub Date]].



17. Social Disadvantage Research Centre. The English Indices of Deprivation 2004. In: Research DoSPaS, ed. Oxford: Communities and Local Government, 2004:14 - 42.
18. Price GM, Paul AA, Key FB, et al. Measurement of diet in a large national survey: comparison of computerized and manual coding of records in household measures. *J. Hum. Nutr. Diet.* 1995;**8**(6):417-28 doi: 10.1111/j.1365-277X.1995.tb00337.x[published Online First: Epub Date]].
19. Cowin I, Emmett P, the ALSPAC study team. Diet in a group of 18-month-old children in South West England, and comparison with the results of a national survey. *J. Hum. Nutr. Diet.* 2000;**13**(2):87-100 doi: 10.1046/j.1365-277x.2000.00220.x[published Online First: Epub Date]].
20. Holland B, Welch AA, Unwin ID, Buss DH, Paul AA, Southgate DAT. *McCance and Widdowson's The Composition of Foods*. 5th Edition ed. Cambridge: Royal Society of Chemistry, 1991.
21. Dennis B, Stamler J, Buzzard M, et al. INTERMAP: the dietary data--process and quality control. *J. Hum. Hypertens.* 2003;**17**(9):609-22
22. Wreiden WL, Barton KL. Calculation and Collation of Typical Food Portion Sizes for Adults Aged 19-64 and Older People Aged 65 and Over. Final Technical Report to the Food Standards Agency. Available from [http://www.foodbase.org.uk/results.php?f\\_report\\_id=82](http://www.foodbase.org.uk/results.php?f_report_id=82) 2006
23. Hu FB, Stampfer MJ, Rimm E, et al. Dietary fat and coronary heart disease: a comparison of approaches for adjusting for total energy intake and modeling repeated dietary measurements. *American Journal of Epidemiology* 1999;**149**(6):531-40
24. Sterne JAC, Cox DR, Smith GD. Sifting the evidence—what's wrong with significance tests? Another comment on the role of statistical methods. *BMJ* 2001;**322**(7280):226-31 doi: 10.1136/bmj.322.7280.226[published Online First: Epub Date]].
25. Perneger TV. What's wrong with Bonferroni adjustments. *BMJ* 1998;**316**(7139):1236-38 doi: 10.1136/bmj.316.7139.1236[published Online First: Epub Date]].
26. Rothman KJ. No adjustments are needed for multiple comparisons. *Epidemiology* 1990;**1**(1):43-6
27. Hills AP, Byrne NM, Lindstrom R, Hill JO. 'Small changes' to diet and physical activity behaviors for weight management. *Obes. Facts* 2013;**6**(3):228-38 doi: 10.1159/000345030[published Online First: Epub Date]].
28. Krebs J, Elley C, Parry-Strong A, et al. The Diabetes Excess Weight Loss (DEWL) Trial: a randomised controlled trial of high-protein versus high-carbohydrate diets over 2 years in type 2 diabetes. *Diabetologia* 2012;**55**(4):905-14 doi: 10.1007/s00125-012-2461-0[published Online First: Epub Date]].
29. Larsen RN, Mann NJ, Maclean E, Shaw JE. The effect of high-protein, low-carbohydrate diets in the treatment of type 2 diabetes: a 12 month randomised controlled trial. *Diabetologia* 2011;**54**(4):731-40
30. Guldbrand H, Dizdar B, Bunjaku B, et al. In type 2 diabetes, randomisation to advice to follow a low-carbohydrate diet transiently improves glycaemic control compared with advice to follow a low-fat diet producing a similar weight loss. *Diabetologia* 2012:1-10 doi: 10.1007/s00125-012-2567-4[published Online First: Epub Date]].
31. Jenkins DJ, Kendall CW, McKeown-Eyssen G, et al. Effect of a low-glycemic index or a high-cereal fiber diet on type 2 diabetes: a randomized trial. *JAMA: Journal of the American Medical Association* 2008;**300**(23):2742-53
32. Wolever TM, Gibbs AL, Mehling C, et al. The Canadian Trial of Carbohydrates in Diabetes (CCD), a 1-y controlled trial of low-glycemic-index dietary carbohydrate in type 2 diabetes: no effect on glycated hemoglobin but reduction in C-reactive protein. *Am. J. Clin. Nutr.* 2008;**87**(1):114-25 doi: 10.1111/j.1365-277X.2008.01114.x[pii][published Online First: Epub Date]].



- 1  
2  
3  
4  
5  
6  
7  
8  
9  
10  
11  
12  
13  
14  
15  
16  
17  
18  
19  
20  
21  
22  
23  
24  
25  
26  
27  
28  
29  
30  
31  
32  
33  
34  
35  
36  
37  
38  
39  
40  
41  
42  
43  
44  
45  
46  
47  
48  
49  
50  
51  
52  
53  
54  
55  
56  
57  
58  
59  
60
33. Bhardwaj S, Passi SJ, Misra A. Overview of trans fatty acids: Biochemistry and health effects. *Diabetes & Metabolic Syndrome: Clinical Research & Reviews* 2011;**5**(3):161-64 doi: 10.1016/j.dsx.2012.03.002[published Online First: Epub Date]].
34. Babio N, Balanza R, Basulto J, Bullo M, Salas-Salvado J. Dietary fibre: influence on body weight, glycemic control and plasma cholesterol profile. *Nutr. Hosp.* 2010;**25**(3):327-40
35. McFadden CB, Brensinger CM, Berlin JA, Townsend RR. Systematic review of the effect of daily alcohol intake on blood pressure. *Am. J. Hypertens.* 2005;**18**(2):276-86 doi: 10.1016/j.amjhyper.2004.07.020[published Online First: Epub Date]].
36. Castaneda-Gonzalez LM, Bacardi Gascon M, Jimenez Cruz A. Effects of low carbohydrate diets on weight and glycemic control among type 2 diabetes individuals: a systemic review of RCT greater than 12 weeks. *Nutr. Hosp.* 2011;**26**(6):1270-6 doi: 10.1590/s0212-16112011000600013[published Online First: Epub Date]].
37. Hu T, Mills KT, Yao L, et al. Effects of Low-Carbohydrate Diets Versus Low-Fat Diets on Metabolic Risk Factors: A Meta-Analysis of Randomized Controlled Clinical Trials. *Am. J. Epidemiol.* 2012;**176**(suppl 7):S44-S54 doi: 10.1093/aje/kws264[published Online First: Epub Date]].
38. Karelis AD, Lavoie M-E, Fontaine J, et al. Anthropometric, metabolic, dietary and psychosocial profiles of underreporters of energy intake: a doubly labeled water study among overweight/obese postmenopausal women[mdash]a Montreal Ottawa New Emerging Team study. *Eur. J. Clin. Nutr.* 2010(64):68-74 doi: <http://dx.doi.org/10.1038/ejcn.2009.119>[published Online First: Epub Date]].
39. Goris AH, Westerterp-Plantenga MS, Westerterp KR. Undereating and underrecording of habitual food intake in obese men: selective underreporting of fat intake. *The American Journal of Clinical Nutrition* 2000;**71**(1):130-34
40. Room R, Mäkelä P, Benegal V, et al. Times to drink: cross-cultural variations in drinking in the rhythm of the week. *Int. J. Public Health* 2012;**57**(1):107-17 doi: 10.1007/s00038-011-0259-3[published Online First: Epub Date]].
41. Black AE. Critical evaluation of energy intake using the Goldberg cut-off for energy intake: basal metabolic rate. A practical guide to its calculation, use and limitations. *International journal of obesity and related metabolic disorders : journal of the International Association for the Study of Obesity* 2000;**24**(9):1119-30
42. Rennie KL, Coward A, Jebb SA. Estimating under-reporting of energy intake in dietary surveys using an individualised method. *Br. J. Nutr.* 2007;**97**(6):1169-76 doi: S0007114507433086 [pii] 10.1017/S0007114507433086[published Online First: Epub Date]].
43. Hall KD, Sacks G, Chandramohan D, et al. Quantification of the effect of energy imbalance on bodyweight. *The Lancet* 2011;**378**(9793):826-37 doi: [http://dx.doi.org/10.1016/S0140-6736\(11\)60812-X](http://dx.doi.org/10.1016/S0140-6736(11)60812-X)[published Online First: Epub Date]].

Table 1: Metabolic characteristics at baseline and 6 months

| Metabolic characteristics                                         | Baseline                     |                             |                              | 6 months                    |                             |                                           | Change (6 months - baseline)                |                                             |                                             |
|-------------------------------------------------------------------|------------------------------|-----------------------------|------------------------------|-----------------------------|-----------------------------|-------------------------------------------|---------------------------------------------|---------------------------------------------|---------------------------------------------|
|                                                                   | Total (n=262)<br>Mean (SD)   | Women (n=87)<br>Mean (SD)   | Men (n=175)<br>Mean (SD)     | Total (n=262)<br>Mean (SD)  | Women (n=87)<br>Mean (SD)   | Men (n=175)<br>Mean (SD)                  | Total (n=262)<br>Mean (SD)                  | Women (n=87)<br>Mean (SD)                   | Men (n=175)<br>Mean (SD)                    |
| Weight, kg                                                        | 88.2 (16.1)                  | 83.1 (17.9)                 | 90.7 (14.5) <sup>e</sup>     | 85.9 (16.3)                 | 80.7 (17.7)                 | 88.5 (15.0)                               | - 2.3 (3.3) <sup>z</sup>                    | - 2.5 (3.3) <sup>z</sup>                    | - 2.3 (3.3) <sup>z</sup>                    |
| Body mass index, kg/m <sup>2</sup>                                | 30.7 (5.3)                   | 31.9 (6.9)                  | 30.2 (4.7) <sup>a</sup>      | 29.9 (5.4)                  | 30.9 (6.2)                  | 29.4 (4.9)                                | - 0.8 (1.2) <sup>z</sup>                    | - 1 (1.0) <sup>z</sup>                      | - 0.8 (1.1) <sup>z</sup>                    |
| Waist circumference, cm                                           | 105 (12)                     | 102 (13) <sup>1</sup>       | 107 (11) <sup>b</sup>        | 103 (12)                    | 100 (13)                    | 104 (12)                                  | - 3 (4) <sup>z</sup>                        | - 3 (4) <sup>z</sup>                        | - 3 (4) <sup>z</sup>                        |
| HbA1c, %<br>(mmol/l)                                              | 6.66 (0.94)<br>(49.0 (10.3)) | 6.67 (0.91)<br>(49.0 (9.9)) | 6.65 (0.95)<br>(49.0 (10.4)) | 6.47 (0.89)<br>(47.0 (9.7)) | 6.41 (0.63)<br>(47.0 (6.9)) | 6.51 (0.99) <sup>1</sup><br>(48.0 (10.8)) | - 0.18 (0.72) <sup>z</sup><br>(- 2.0 (7.9)) | - 0.27 (0.63) <sup>z</sup><br>(- 3.0 (6.9)) | - 0.14 (0.75) <sup>x</sup><br>(- 1.5 (8.2)) |
| Total cholesterol, mmol/l                                         | 4.33 (0.90)                  | 4.66 (0.89) <sup>1</sup>    | 4.16 (0.86) <sup>1c</sup>    | 4.29 (0.93)                 | 4.66 (0.98)                 | 4.11 (0.84)                               | - 0.03 (0.69)                               | 0.01 (0.79)                                 | - 0.06 (0.63)                               |
| LDL-cholesterol, mmol/l                                           | 2.30 (0.78)                  | 2.55 (0.81) <sup>3</sup>    | 2.18 (0.74) <sup>2c</sup>    | 2.27 (0.81)                 | 2.51 (0.88) <sup>3</sup>    | 2.15 (0.75) <sup>1</sup>                  | - 0.03 (0.67)                               | - 0.03 (0.76)                               | - 0.03 (0.62)                               |
| HDL-cholesterol, mmol/l                                           | 1.29 (0.33)                  | 1.37 (0.39) <sup>1</sup>    | 1.25 (0.29) <sup>1a</sup>    | 1.34 (0.37)                 | 1.45 (0.47)                 | 1.28 (0.30)                               | 0.05 (0.27) <sup>y</sup>                    | 0.09 (0.37) <sup>x</sup>                    | 0.03 (0.21)                                 |
| Systolic blood pressure, mmHg                                     | 134 (16)                     | 133 (16)                    | 134 (15)                     | 134 (15)                    | 135 (16)                    | 134 (14)                                  | 1 (12)                                      | 2 (13)                                      | 0 (12)                                      |
| Diastolic blood pressure, mmHg                                    | 79 (8)                       | 78 (8)                      | 79 (8)                       | 78 (8)                      | 78 (8)                      | 78 (8)                                    | 0 (7)                                       | 0 (8)                                       | 0 (7)                                       |
| Physical activity<br>(n=223)                                      | (n=223)                      | (n=75)                      | (n=148)                      | (n=223)                     | (n=75)                      | (n=148)                                   | (n=223)                                     | (n=75)                                      | (n=148)                                     |
| Minutes of moderate to vigorous<br>physical activity / day (MVPA) | 26 (21)                      | 21 (18) <sup>12</sup>       | 29 (22) <sup>27</sup>        | 33 (25)                     | 21 (19)                     | 38 (26)                                   | 7 (21)                                      | 1 (12)                                      | 10 (24)                                     |

a = p<0.05; b = p<0.005; c = p<0.001 women vs. men at baseline

x = p<0.05; y = p<0.005; z = p<0.001 baseline vs. 6 month

Numerical superscripts indicate number of participants with missing data for the variable of interest. [Cases with missing data are excluded listwise](#)

Table 2: Nutrient intake at baseline and 6 months

| Mean daily intake nutrients       | Baseline                     |                              |                                           | 6 months                     |                              |                                           | Change (6 months - baseline)                |                               |                                               |
|-----------------------------------|------------------------------|------------------------------|-------------------------------------------|------------------------------|------------------------------|-------------------------------------------|---------------------------------------------|-------------------------------|-----------------------------------------------|
|                                   | Total (n=262)<br>Mean (SD)   | Women (n=87)<br>Mean (SD)    | Men (n=175)<br>Mean (SD)                  | Total (n=262)<br>Mean (SD)   | Women (n=87)<br>Mean (SD)    | Men (n=175)<br>Mean (SD)                  | Total (n=262)<br>Mean (SD)                  | Women (n=87)<br>Mean (SD)     | Men (n=175)<br>Mean (SD)                      |
| Energy (kcal)                     | 1796 (461)                   | 1582 (379)                   | 1903 (462) <sup>c</sup>                   | 1610 (418)                   | 1459 (326)                   | 1685 (439) <sup>c</sup>                   | -187 (315) <sup>z</sup>                     | - 123 (270) <sup>z</sup>      | - 218 (332) <sup>az</sup>                     |
| Protein (g)                       | 80 (19)                      | 73 (16)                      | 83 (20) <sup>c</sup>                      | 74 (19)                      | 68 (13)                      | 77 (20) <sup>c</sup>                      | - 6 (17) <sup>z</sup>                       | - 5 (15) <sup>y</sup>         | - 6 (19) <sup>z</sup>                         |
| Total carbohydrates (g)           | 202 (55)                     | 186 (48)                     | 211 (57) <sup>b</sup>                     | 186 (53)                     | 170 (39)                     | 194 (58) <sup>b</sup>                     | - 17 (41) <sup>z</sup>                      | - 15 (33) <sup>z</sup>        | - 17 (45) <sup>z</sup>                        |
| Total sugar (g)                   | 81 (32)                      | 77 (28)                      | 83 (34)                                   | 75 (31)                      | 71 (23)                      | 77 (34)                                   | - 6 (26) <sup>z</sup>                       | - 6 (21) <sup>x</sup>         | - 6 (28) <sup>y</sup>                         |
| Starch (g)                        | 119 (36)                     | 105 (30)                     | 126 (37) <sup>c</sup>                     | 109 (31)                     | 97 (26)                      | 115 (32) <sup>c</sup>                     | -10 (28) <sup>z</sup>                       | - 9 (24) <sup>y</sup>         | - 11 (30) <sup>z</sup>                        |
| Non-starch polysaccharide (g)     | 17 (5)                       | 16 (5)                       | 17 (5)                                    | 16 (5)                       | 15 (4)                       | 17 (5) <sup>a</sup>                       | - 1 (5)                                     | - 1 (4)                       | 0 (5)                                         |
| Total fat (g)                     | 69 (22)                      | 61 (20)                      | 73 (22) <sup>c</sup>                      | 61 (20)                      | 56 (19)                      | 64 (20) <sup>b</sup>                      | - 8 (18) <sup>z</sup>                       | - 5 (17) <sup>x</sup>         | - 9 (18) <sup>z</sup>                         |
| Saturated fat (g)                 | 23 (9)                       | 21 (8)                       | 24 (9) <sup>b</sup>                       | 20 (9)                       | 19 (9)                       | 21 (9)                                    | - 3 (8) <sup>z</sup>                        | - 2 (7) <sup>x</sup>          | - 3 (8) <sup>z</sup>                          |
| Trans fat (g)                     | 2.3 (1.1)                    | 2.0 (1)                      | 2.4 (1.1) <sup>b</sup>                    | 2.1 (1.1)                    | 1.9 (1.1)                    | 2.2 (1.1) <sup>a</sup>                    | - 0.2 (1.1) <sup>y</sup>                    | - 0.1 (1.1)                   | - 0.3 (1.2) <sup>y</sup>                      |
| Monounsaturated fat (g)           | 24 (8)                       | 21 (8)                       | 26 (8) <sup>c</sup>                       | 22 (8)                       | 20 (7)                       | 23 (8) <sup>b</sup>                       | - 2 (7) <sup>z</sup>                        | - 1 (8) <sup>x</sup>          | - 3 (7) <sup>z</sup>                          |
| Polyunsaturated fat (g)           | 13 (6)                       | 12 (6)                       | 14 (6) <sup>a</sup>                       | 12 (4)                       | 11 (4)                       | 13 (5) <sup>a</sup>                       | - 1 (5) <sup>z</sup>                        | -1 (6)                        | - 1 (5) <sup>y</sup>                          |
| Alcohol median (IQR) (g)          | <del>7 (0-23)</del> 14 (18)  | <del>1 (0-12)</del> 7 (11)   | <del>13 (0-27)</del> 18 (20) <sup>a</sup> | <del>4 (0-16)</del> 10 (13)  | <del>0 (0-11)</del> 7 (9)    | <del>5 (0-18)</del> 11 (14) <sup>b</sup>  | <del>0 (-3-1)</del> -5 (14) <sup>z</sup>    | <del>0 (-3-4)</del> 10        | <del>-3 (-14-0)</del> -7 (15) <sup>cz</sup>   |
| % Energy from protein             | 18.3 (3.6)                   | 19.0 (3.7)                   | 18.0 (3.5) <sup>a</sup>                   | 18.8 (3.5)                   | 19.0 (3.3)                   | 18.7 (3.6)                                | 0.5 (3.7) <sup>z</sup>                      | 0.0 (3.6)                     | 0.7 (3.8) <sup>y</sup>                        |
| % Energy from total carbohydrates | 43.2 (6.6)                   | 44.8 (6.4)                   | 42.4 (6.6) <sup>a</sup>                   | 44.1 (6.5)                   | 44.7 (6.2)                   | 43.8 (6.6)                                | 0.9 (6.0) <sup>z</sup>                      | - 0.1 (6.2)                   | 1.4 (5.9) <sup>y</sup>                        |
| % Energy from total fat           | 33.5 (5.6)                   | 33.4 (5.8)                   | 33.6 (5.5)                                | 33.3 (5.8)                   | 33.3 (6.4)                   | 33.3 (5.4)                                | -0.2 (5.9)                                  | - 0.1 (6.3)                   | - 0.3 (5.7)                                   |
| % Energy from saturated fat       | 11.2 (3.1)                   | 11.4 (3.4)                   | 11.2 (3.1)                                | 11.0 (3.4)                   | 11.1 (3.6)                   | 10.9 (3.2)                                | - 0.3 (3.3)                                 | - 0.3 (3.1)                   | - 0.3 (3.5)                                   |
| % Energy from trans fat           | 1.1 (0.4)                    | 1.1 (0.43)                   | 1.1 (0.5)                                 | 1.1 (0.5)                    | 1.1 (0.4)                    | 1.1 (0.5)                                 | 0.0 (0.5)                                   | 0.0 (0.5)                     | 0.0 (0.5)                                     |
| % Energy from monounsaturated fat | 11.7 (2.5)                   | 11.5 (2.6)                   | 11.9 (2.5)                                | 11.9 (2.5)                   | 11.7 (2.7)                   | 12.0 (2.5)                                | - 0.2 (2.8)                                 | 0.2 (3.2)                     | 0.1 (2.6)                                     |
| % Energy from polyunsaturated fat | 6.5 (2.2)                    | 6.7 (2.4)                    | 6.4 (2.1)                                 | 6.6 (1.9)                    | 6.6 (1.9)                    | 6.6 (1.9)                                 | 0.1 (2.4)                                   | 0.0 (2.6)                     | 0.2 (2.3)                                     |
| % Energy from total sugar         | 17.2 (5.7)                   | 18.7 (5.5)                   | 16.5 (5.6) <sup>b</sup>                   | 17.7 (5.7)                   | 18.8 (5.4)                   | 17.2 (5.8) <sup>a</sup>                   | 0.5 (5.0)                                   | 0.2 (5.2)                     | 0.7 (4.9)                                     |
| % Energy from alcohol             | <del>3 (0-8)</del> 5.0 (6.1) | <del>2.9 (4.3)</del> 1 (0-5) | <del>6.1 (6.6)</del> 5 (0-9) <sup>c</sup> | <del>3.9 (4.9)</del> 2 (0-7) | <del>0 (0-6)</del> 3.0 (3.9) | <del>4.3 (5.3)</del> 2 (0-7) <sup>a</sup> | <del>-1.2 (4.7)</del> 0 (-3-1) <sup>z</sup> | <del>0.2 (4.0)</del> 0 (-1-2) | <del>-1.8 (5.0)</del> -1 (-4-0) <sup>cz</sup> |

a = p<0.05; b = p<0.005; c = p<0.001 women vs. men  
y = p<0.005; z = p<0.001 baseline vs. 6 months

Table 3: Associations between macronutrients and metabolic outcomes in men (n=148) and women (n=75) who provided physical activity data.

| Macronutrient                                |       | Metabolic outcomes           | Regression coefficient, $\beta$<br>(95% Confidence interval) | p<br>value |
|----------------------------------------------|-------|------------------------------|--------------------------------------------------------------|------------|
| Change to % energy from total carbohydrates  | Men   | HbA1c %<br>( <u>mmol/l</u> ) | -0.003 (-0.006, -0.001)<br><u>(-0.005 (-0.009, -0.001))</u>  | 0.009      |
|                                              | All   | Total cholesterol            | -0.023 (-0.044, -0.002)                                      | 0.033      |
| Change to fibre (nsp) intake (g)             | Men   | Total cholesterol            | -0.025 (-0.047, -0.003)                                      | 0.023      |
|                                              | All   | LDL cholesterol              | 0.018 (0.003, 0.032)                                         | 0.016      |
| Change to % energy from total fat            | Men   | LDL cholesterol              | 0.024 (0.006, 0.042)                                         | 0.011      |
|                                              | All   | Waist circumference          | 0.014 (0.003, 0.024)                                         | 0.011      |
| Change to % energy from trans fat            | Women | Waist circumference          | 0.029 (0.006, 0.052)                                         | 0.015      |
|                                              |       | Total cholesterol            | 0.399 (0.028, 0.770)                                         | 0.036      |
|                                              |       | LDL cholesterol              | 0.365 (0.042, 0.688)                                         | 0.028      |
| Change to % energy from monounsaturated fats | All   | LDL cholesterol              | 0.036 (0.006, 0.065)                                         | 0.018      |
| Change to % energy from alcohol              | All   | Diastolic blood pressure     | 0.217 (0.020, 0.414)                                         | 0.031      |
|                                              | Men   | Diastolic blood pressure     | 0.276 (0.055, 0.497)                                         | 0.015      |

All models are adjusted for change in energy intake, outcome at baseline, age, BMI, time since diagnosis, relevant hypoglycaemic mediation (metformin, sulphonylureas, glitazones), lipid lowering medication or anti-hypertensives medication, dietary supplements, mean daily minutes of moderate to vigorous physical activity. For each macronutrient listed a 1% (1g for fibre) increase is associated with the change in outcome listed
